# Supplementary material for: Integrated multi-omic analyses of bovine milk identify biomarkers of negative energy balance
Source: Royal Society of Chemistry journal article supplement (doi:10.1039/d4mo00190g), 2025-01-01
Supplement: d4mo00190g1.xlsx [file d4mo00190g1.xlsx]

## Sheet: Supp Table 1
variable	weight	block		Data integration analysis for biomarker discovery using latent components on four blocks of data from a moderate (LM) feed restriction trial (8 cows, -20% dry matter intake). Loading weights on the first component of each milk variable corresponding to a sparsity level of 10%, within each block.
bta-chr16_12761_mt	-0.331988	FG miRNome
hsa-miR-31-3p	-0.235355	FG miRNome
cgr-miR-25-5p	-0.22902	FG miRNome
hsa-miR-491-3p	-0.228421	FG miRNome
bta-miR-451	-0.210077	FG miRNome
bta-chr6_38228_mt	0.208569	FG miRNome
bta-chrX_45755_mt	-0.20645	FG miRNome
bta-chr19_17816_mt	0.200436	FG miRNome
bta-chr21_22200_mt	0.198997	FG miRNome
bta-chr5_37319_mt	-0.196077	FG miRNome
bta-chr19_17654_mt	0.195349	FG miRNome
bta-miR-2285ae	-0.193232	FG miRNome
bta-chr19_17614_mt	0.185548	FG miRNome
bta-chr12_6503_mt	0.183214	FG miRNome
bta-miR-486	-0.162363	FG miRNome
bta-chr8_41529_mt	0.160187	FG miRNome
bta-chr16_12513_mt	0.155955	FG miRNome
bta-chr9_43846_mt	0.143767	FG miRNome
bta-miR-409a	0.140148	FG miRNome
bta-chr16_12378_mt	0.12791	FG miRNome
bta-chr9_43183_mt	0.12791	FG miRNome
bta-chr2_20240_mt	0.12791	FG miRNome
bta-chr11_4485_mt	-0.125479	FG miRNome
bta-miR-154c	-0.117083	FG miRNome
bta-chrUn_GJ059508v1_44427_mt	-0.103577	FG miRNome
bta-chr7_40722_mt	0.102361	FG miRNome
bta-miR-2285cg	0.101572	FG miRNome
bta-chr25_26350_st	0.101169	FG miRNome
bta-chr14_9283_mt	0.100848	FG miRNome
bta-chr7_39889_mt	-0.0963133	FG miRNome
bta-chr9_43104_mt	0.0945373	FG miRNome
bta-chr8_42846_mt	0.0868986	FG miRNome
mmu-miR-144-5p	-0.0866589	FG miRNome
bta-chr10_2969_st	0.0846861	FG miRNome
bta-chr23_24307_mt	0.0741647	FG miRNome
bta-chr25_26350_mt	0.070953	FG miRNome
bta-miR-2285dj	0.0650438	FG miRNome
bta-miR-2285ag-3p	-0.0637946	FG miRNome
bta-chr21_21490_mt	0.0632924	FG miRNome
hsa-miR-1277-5p	0.0594024	FG miRNome
bta-miR-144	-0.0574342	FG miRNome
bta-chr19_17086_mt	0.0550662	FG miRNome
mmu-miR-182-3p	-0.0495558	FG miRNome
bta-chr1_563_mt	0.0479498	FG miRNome
bta-miR-2349	0.045484	FG miRNome
bta-miR-2410	0.0390031	FG miRNome
bta-miR-4449	-0.0355836	FG miRNome
bta-chr13_8148_mt	0.0335745	FG miRNome
bta-miR-1277	0.0270254	FG miRNome
bta-chr3_33057_mt	0.0264842	FG miRNome
bta-miR-133a	-0.025323	FG miRNome
bta-miR-425-3p	-0.0233464	FG miRNome
bta-chr7_39207_mt	0.0195097	FG miRNome
bta-miR-432	-0.0187322	FG miRNome
bta-chr5_35995_mt	0.0186025	FG miRNome
bta-chr18_15217_mt	0.0177676	FG miRNome
bta-chr3_33134_mt	-0.0177407	FG miRNome
bta-chr10_2765_mt	-0.0175968	FG miRNome
bta-chr16_12243_mt	0.0174564	FG miRNome
rno-miR-338-5p	-0.0173286	FG miRNome
bta-miR-11992	-0.0160205	FG miRNome
bta-miR-2904	0.0147893	FG miRNome
bta-chr3_32081_mt	-0.0145097	FG miRNome
bta-chr23_24329_mt	0.0135912	FG miRNome
bta-chrX_45788_mt	-0.0131909	FG miRNome
hsa-miR-152-5p	0.0128638	FG miRNome
bta-chr29_30048_mt	0.011377	FG miRNome
bta-chr15_10546_mt	-0.00964512	FG miRNome
bta-miR-2285af	-0.00910099	FG miRNome
mmu-miR-188-3p	0.00438123	FG miRNome
bta-chr16_12247_mt	0.00352992	FG miRNome
bta-miR-326	-0.00145212	FG miRNome
bta-chr9_43668_st	0.000995231	FG miRNome
bta-chr1_90_mt	0.324922	milk miRNome
bta-chr3_32262_mt	0.267338	milk miRNome
hsa-miR-200c-5p	-0.25246	milk miRNome
bta-chr14_9211_mt	0.250819	milk miRNome
bta-chr19_17086_mt	0.229605	milk miRNome
mdo-miR-32-3p	-0.22898	milk miRNome
bta-chr28_29278_mt	-0.214132	milk miRNome
bta-chr2_19057_mt	0.205645	milk miRNome
bta-chrX_45480_mt	0.20192	milk miRNome
bta-miR-185	-0.186273	milk miRNome
bta-miR-423-5p	0.18373	milk miRNome
bta-miR-338	-0.17955	milk miRNome
bta-chr20_20849_mt	0.173436	milk miRNome
bta-chr17_13327_mt	0.157189	milk miRNome
bta-miR-2284b	-0.156152	milk miRNome
bta-chr25_25976_mt	0.154472	milk miRNome
bta-chr7_41090_mt	0.153176	milk miRNome
bta-miR-125b	0.146564	milk miRNome
bta-chr5_35995_mt	0.131268	milk miRNome
bta-chr12_6503_mt	0.124645	milk miRNome
bta-miR-2419-5p	0.123155	milk miRNome
bta-miR-301a	-0.119813	milk miRNome
bta-chr18_14520_mt	0.114846	milk miRNome
bta-chr18_15283_mt	0.114001	milk miRNome
bta-miR-2285cl	-0.113414	milk miRNome
ssc-miR-374b-3p	-0.108879	milk miRNome
bta-miR-484	0.108867	milk miRNome
bta-miR-2285aa	-0.101197	milk miRNome
bta-chr29_30418_mt	0.0943717	milk miRNome
bta-chr10_2979_mt	0.0894945	milk miRNome
bta-chr3_32653_mt	-0.086681	milk miRNome
bta-chr21_21521_mt	0.0825958	milk miRNome
bta-chr12_6011_mt	0.0802988	milk miRNome
bta-miR-6529a	0.0767314	milk miRNome
bta-miR-125a	0.0728557	milk miRNome
bta-chr3_33291_mt	0.0681082	milk miRNome
bta-chr5_36523_mt	0.067284	milk miRNome
bta-chr5_35699_mt	0.0630058	milk miRNome
hsa-miR-361-3p	0.0609098	milk miRNome
bta-chr18_15505_mt	-0.039472	milk miRNome
bta-chr2_19973_mt	0.0394303	milk miRNome
bta-chr16_12378_mt	0.0349127	milk miRNome
bta-chr2_20240_mt	0.0349127	milk miRNome
bta-miR-2285au	-0.0344633	milk miRNome
bta-chrX_45078_mt	0.0339839	milk miRNome
bta-miR-2284j	-0.0334886	milk miRNome
bta-chr9_43183_mt	0.0318952	milk miRNome
bta-chr6_38205_mt	0.0264001	milk miRNome
bta-chr8_41806_mt	0.0250469	milk miRNome
bta-chr10_2366_mt	0.0244698	milk miRNome
bta-chr26_27472_mt	-0.0143489	milk miRNome
bta-chr21_22422_mt	0.0120554	milk miRNome
bta-miR-151-5p	0.0111137	milk miRNome
bta-chr20_21167_mt	0.00945026	milk miRNome
bta-chr29_30423_mt	0.00544119	milk miRNome
Serotransferrin	-0.546462	proteome
Actin, cytoplasmic 1	-0.402482	proteome
Actin, cytoplasmic 2	-0.402482	proteome
Beta lactoglobulin D (Fragment)	0.37084	proteome
Keratin, type II cytoskeletal 5	-0.308127	proteome
NADH-cytochrome b5 reductase 3	0.206164	proteome
Peptidyl-prolyl cis-trans isomerase A	-0.20325	proteome
Mucin-1	0.185139	proteome
Fatty acid synthase	-0.134037	proteome
Actin, alpha skeletal muscle	-0.094161	proteome
Isoform LMW of Kininogen-2	-0.002773	proteome
Lactose content	0.57658	other
Fat content	-0.537459	other
Milk yield	0.468373	other
Isocitrate	-0.307275	other
alpha-lactalbumin	0.254759	other

## Sheet: Supp Table 2
variable	weight	block		Data integration analysis for biomarker discovery using latent components on four blocks of data from an intense (SH) feed restriction trial (8 cows, -64% dry matter intake). Loading weights on the first component of each milk variable corresponding to a sparsity level of 10%, within each block.
hsa-miR-3613-3p	0.427457	FG miRNome
cgr-miR-25-5p	0.304612	FG miRNome
bta-chr8_42865_mt	0.259447	FG miRNome
bta-chrUn_GJ057397v1_44378_mt	-0.238037	FG miRNome
bta-chr14_9283_mt	-0.224104	FG miRNome
mmu-let-7g-3p	0.205036	FG miRNome
bta-chr3_32653_mt	-0.200527	FG miRNome
bta-chr22_23077_mt	0.199687	FG miRNome
bta-chr9_43846_mt	-0.172163	FG miRNome
bta-miR-6119-5p	0.164702	FG miRNome
bta-miR-877	0.158129	FG miRNome
bta-chr23_23885_mt	0.154626	FG miRNome
bta-miR-6120-3p	0.153268	FG miRNome
bta-miR-1343-3p	0.153164	FG miRNome
chi-miR-342-5p	0.142228	FG miRNome
bta-miR-11986c	0.138335	FG miRNome
mmu-miR-210-5p	0.131339	FG miRNome
bta-miR-491	0.129104	FG miRNome
bta-miR-342	0.126721	FG miRNome
ssc-miR-24-1-5p	0.115023	FG miRNome
bta-chr25_26350_st	-0.112666	FG miRNome
bta-miR-34a	0.112007	FG miRNome
bta-chr6_38228_mt	-0.101048	FG miRNome
bta-chr1_563_mt	-0.0999447	FG miRNome
bta-chr7_39836_mt	-0.0959545	FG miRNome
hsa-miR-1277-5p	0.0952625	FG miRNome
bta-chr26_27472_mt	0.0916159	FG miRNome
bta-miR-2285bj	0.0906261	FG miRNome
bta-miR-1260b	0.0881046	FG miRNome
bta-miR-874	0.0846073	FG miRNome
bta-chr7_40722_mt	-0.080522	FG miRNome
bta-chr12_6175_mt	0.0782524	FG miRNome
bta-chr5_37163_mt	-0.0774478	FG miRNome
bta-miR-2285bx	-0.0759386	FG miRNome
bta-chrX_44532_mt	-0.0723723	FG miRNome
bta-chr14_9261_mt	-0.0718342	FG miRNome
bta-miR-2285aa	0.0703877	FG miRNome
bta-miR-2285al-5p	0.070192	FG miRNome
bta-miR-11987	-0.0683773	FG miRNome
bta-miR-11973	0.0630277	FG miRNome
bta-miR-138	0.0617243	FG miRNome
bta-chr15_10987_mt	0.0610253	FG miRNome
bta-chr7_41141_mt	0.0545303	FG miRNome
bta-miR-222	0.0520484	FG miRNome
bta-miR-11986b	-0.047666	FG miRNome
bta-chr21_21585_mt	-0.0442531	FG miRNome
bta-chr15_10073_mt	0.0384596	FG miRNome
rno-miR-330-5p	0.0332237	FG miRNome
bta-miR-2443	-0.0326743	FG miRNome
bta-chr6_38867_mt	0.0251548	FG miRNome
bta-miR-2285r	0.0248939	FG miRNome
chi-miR-3432-3p	0.0184941	FG miRNome
bta-miR-12044	0.0179148	FG miRNome
bta-miR-10179-5p	-0.0170651	FG miRNome
bta-chr10_2366_mt	-0.0159078	FG miRNome
bta-miR-192	0.015212	FG miRNome
bta-miR-296-5p	0.0143366	FG miRNome
bta-miR-2411-3p	0.0102689	FG miRNome
bta-chr17_14031_mt	-0.00963974	FG miRNome
bta-chr22_22618_mt	0.00907696	FG miRNome
hsa-miR-652-5p	0.00841192	FG miRNome
hsa-miR-26b-3p	0.00775089	FG miRNome
bta-miR-328	0.00273909	FG miRNome
bta-chr10_3038_mt	-0.00248912	FG miRNome
rno-miR-27b-5p	-0.280385	milk miRNome
bta-chr21_21423_mt	0.273273	milk miRNome
bta-chr14_9640_mt	-0.272135	milk miRNome
bta-miR-326	0.264129	milk miRNome
bta-miR-10179-5p	-0.246383	milk miRNome
bta-chr8_41852_mt	0.213734	milk miRNome
bta-chr9_43571_mt	0.210927	milk miRNome
bta-miR-429	-0.206689	milk miRNome
mmu-miR-200b-5p	-0.185671	milk miRNome
bta-miR-324	0.175115	milk miRNome
bta-miR-874	0.168824	milk miRNome
bta-miR-10167-3p	0.165426	milk miRNome
bta-chr13_8269_mt	-0.135092	milk miRNome
bta-chr1_563_mt	-0.134862	milk miRNome
bta-miR-6522	-0.134079	milk miRNome
bta-miR-25	0.132977	milk miRNome
bta-chr19_16778_mt	0.130513	milk miRNome
bta-chr20_20651_mt	0.11776	milk miRNome
bta-miR-96	-0.117217	milk miRNome
bta-chr18_15104_mt	0.116444	milk miRNome
bta-miR-10172-3p	0.115438	milk miRNome
mmu-miR-138-1-3p	0.114468	milk miRNome
bta-miR-1271	0.112216	milk miRNome
bta-miR-1249	0.110812	milk miRNome
bta-chr20_20411_mt	0.108117	milk miRNome
bta-miR-132	0.104674	milk miRNome
hsa-miR-135a-2-3p	-0.10323	milk miRNome
hsa-miR-212-3p	0.100679	milk miRNome
bta-miR-342	0.0948974	milk miRNome
bta-miR-197	0.094488	milk miRNome
bta-miR-2424	0.0943393	milk miRNome
bta-miR-1306	0.0923578	milk miRNome
mmu-miR-200a-5p	-0.0918528	milk miRNome
bta-miR-11999	0.0913064	milk miRNome
bta-chr25_26942_mt	0.0870453	milk miRNome
bta-miR-151-5p	-0.0803085	milk miRNome
bta-chr22_23498_mt	0.0792818	milk miRNome
hsa-miR-23a-5p	0.0787879	milk miRNome
bta-chr5_36191_mt	0.0772195	milk miRNome
bta-chr21_22093_mt	-0.0741511	milk miRNome
bta-miR-380-3p	-0.0737905	milk miRNome
bta-chr14_9309_mt	0.0713641	milk miRNome
bta-chr19_16527_mt	0.0699462	milk miRNome
bta-chr3_33057_mt	-0.0631597	milk miRNome
bta-chr18_15510_mt	0.0628869	milk miRNome
ssc-miR-24-1-5p	0.0620483	milk miRNome
hsa-let-7e-3p	-0.0619404	milk miRNome
bta-chr19_17091_mt	0.0618075	milk miRNome
bta-chr5_35570_mt	0.0607913	milk miRNome
bta-miR-11977	0.0597606	milk miRNome
bta-chr25_26935_mt	-0.0594126	milk miRNome
bta-miR-11997	0.057884	milk miRNome
bta-miR-200b	-0.0572688	milk miRNome
bta-miR-6715	-0.0512468	milk miRNome
hsa-miR-33b-3p	-0.0480541	milk miRNome
bta-chr5_35699_st	-0.046298	milk miRNome
bta-chr16_12255_mt	-0.0425004	milk miRNome
bta-chr5_36803_mt	0.0346231	milk miRNome
bta-chr16_12378_mt	-0.0336805	milk miRNome
bta-chr2_20240_mt	-0.0334424	milk miRNome
bta-chr9_43183_mt	-0.0321611	milk miRNome
bta-miR-221	0.029445	milk miRNome
bta-miR-744	0.0283307	milk miRNome
hsa-let-7d-3p	0.0276242	milk miRNome
bta-chr19_17763_mt	0.0244644	milk miRNome
mmu-let-7i-3p	0.0239347	milk miRNome
bta-chr8_41526_st	-0.0232455	milk miRNome
rno-miR-338-5p	0.023	milk miRNome
bta-miR-6529a	0.0217018	milk miRNome
bta-miR-142-3p	0.0215245	milk miRNome
bta-chr5_35639_mt	0.0179599	milk miRNome
bta-miR-425-5p	0.0176334	milk miRNome
hsa-miR-26b-3p	0.0173934	milk miRNome
bta-miR-2461-3p	-0.0154504	milk miRNome
bta-miR-2353	0.0148492	milk miRNome
bta-chr7_39259_mt	0.0123464	milk miRNome
bta-chr17_13489_mt	0.0098112	milk miRNome
bta-chr2_20275_mt	0.00873091	milk miRNome
bta-miR-2285at	-0.00801616	milk miRNome
bta-miR-187	0.0071838	milk miRNome
bta-chr4_34583_mt	0.00152661	milk miRNome
bta-miR-340	-0.000982942	milk miRNome
Serotransferrin	0.606783	proteome
Serpin family G member 1	0.414297	proteome
Factor XIIa inhibitor	0.373378	proteome
Lipopolysaccharide-binding protein	0.284867	proteome
Complement factor B	0.27658	proteome
Complement component C9	0.273729	proteome
Alpha-1-antiproteinase	0.174339	proteome
Complement C3	0.156722	proteome
Antithrombin-III	0.12803	proteome
Gelsolin	0.0907588	proteome
Endopin 2C	0.0705087	proteome
Fibrinogen alpha chain	0.0602639	proteome
Lactose content	-0.722233	other
Milk yield	-0.549083	other
Glucose	-0.37132	other
Glutamate	-0.194695	other
Uric acid	-0.0332181	other

## Sheet: Supp Table 3
Variable	Category	MINT loading	Rank		Horizontal data integration analysis for Net Energy Balance biomarker using the Multivariate INTegrative method (MINT), from two trials, a moderate feed restriction trial (8 cows, -20% dry matter intake) and an intense feed restriction trial (8 cows, -64% dry matter intake) with multi-omics data (milk yield and contents, metabolite concentrations (ie « other » category), proteomes, and whole milk…
Serotransferrin	skim milk proteome	0.0652321	1
cgr.miR.25.5p	fat globule miRNome	0.063038	2
Lactose content	other	-0.0607867	3
Milk yield	other	-0.0594005	4
hsa.miR.3613.3p	fat globule miRNome	0.0566952	5
bta.chr9_43846_mt	fat globule miRNome	-0.0559255	6
bta.miR.2284b	whole milk miRNome	0.0546801	7
bta.chr16_12378_mt	whole milk miRNome	-0.0544635	8
bta.chr2_20240_mt	whole milk miRNome	-0.0544505	9
uric acid	other	-0.0544013	10
bta.chr9_43183_mt	whole milk miRNome	-0.0542931	11
bta.chr8_42865_mt	fat globule miRNome	0.0531661	12
bta.chr6_38228_mt	fat globule miRNome	-0.0529796	13
bta.miR.1249	whole milk miRNome	0.0522485	14
Polymeric immunoglobulin receptor	skim milk proteome	0.052081	15
bta.chr3_33057_mt	whole milk miRNome	-0.0518724	16
Alpha-1-antiproteinase	skim milk proteome	0.0517979	17
bta.miR.151.5p	whole milk miRNome	-0.0513185	18
bta.miR.10179.5p	whole milk miRNome	-0.0507369	19
bta.chr12_6011_mt	whole milk miRNome	-0.0499668	20
bta.miR.301a	whole milk miRNome	0.0499584	21
bta.chr25_26350_st	fat globule miRNome	-0.0499447	22
bta.chr1_563_mt	fat globule miRNome	-0.0498472	23
bta.chr1_563_mt	whole milk miRNome	-0.049759	24
bta.chr14_9283_mt	fat globule miRNome	-0.0494061	25
P81265.2	skim milk proteome	0.0493415	26
bta.chr19_17654_mt	fat globule miRNome	-0.0489395	27
bta.miR.486	fat globule miRNome	0.0483304	28
Actin, cytoplasmic 2	skim milk proteome	0.048044	29
bta.miR.100	whole milk miRNome	-0.0480057	30
Actin, cytoplasmic 1	skim milk proteome	0.0478982	31
Antithrombin-III	skim milk proteome	0.0477914	32
glutamate	other	-0.0476926	33
bta.chr7_40722_mt	fat globule miRNome	-0.0475897	34
Apolipoprotein A-I	skim milk proteome	0.0475042	35
bta.miR.491	fat globule miRNome	0.0471644	36
bta.chr2_19057_mt	whole milk miRNome	-0.0470966	37
Serum albumin	skim milk proteome	0.0470735	38
Angiotensinogen	skim milk proteome	0.0470688	39
Factor XIIa inhibitor	skim milk proteome	0.0468663	40
bta.chr3_33057_mt	fat globule miRNome	-0.0467762	41
bta.miR.451	fat globule miRNome	0.0464571	42
bta.miR.147	whole milk miRNome	0.0464324	43
Alpha-2-HS-glycoprotein	skim milk proteome	0.0463751	44
Kininogen-1	skim milk proteome	0.0463633	45
rno.miR.338.5p	whole milk miRNome	0.0461971	46
bta.miR.1343.3p	fat globule miRNome	0.0460952	47
CD9 antigen	skim milk proteome	0.0459842	48
glucose	other	-0.0456701	49
hsa.miR.212.3p	whole milk miRNome	0.0454417	50
bta.miR.125b	whole milk miRNome	-0.0447436	51
bta.miR.502a	whole milk miRNome	-0.0445297	52
Elongation factor 1-alpha 1	skim milk proteome	0.0445088	53
bta.miR.31	whole milk miRNome	0.0444351	54
bta.miR.210	whole milk miRNome	0.0443079	55
Protein HP-20 homolog	skim milk proteome	0.044273	56
Complement C3	skim milk proteome	0.0441431	57
Serpin A3-7	skim milk proteome	0.0439374	58
Protein OS-9	skim milk proteome	0.0438272	59
Lactoperoxidase	skim milk proteome	0.0436582	60
Serpin family G member 1	skim milk proteome	0.0435332	61
hsa.miR.29b.1.5p	whole milk miRNome	0.0434912	62
Gelsolin	skim milk proteome	0.043316	63
bta.miR.2285aa	fat globule miRNome	0.0431273	64
bta.miR.142.3p	whole milk miRNome	0.0430906	65
bta.miR.2284w	whole milk miRNome	0.0430728	66
Alpha-1B-glycoprotein	skim milk proteome	0.0429463	67
Lipopolysaccharide-binding protein	skim milk proteome	0.042946	68
bta.miR.338	whole milk miRNome	0.0428383	69
Complement component C9	skim milk proteome	0.0428263	70
mmu.let.7g.3p	fat globule miRNome	0.0424582	71
bta.miR.10179.5p	fat globule miRNome	-0.0423841	72
STOM protein	skim milk proteome	0.042299	73
bta.miR.1291	whole milk miRNome	0.0422217	74
bta.miR.99a.5p	whole milk miRNome	-0.0421674	75
bta.miR.2887	whole milk miRNome	-0.0421292	76
bta.miR.2284x	fat globule miRNome	0.0421111	77
bta.miR.499	fat globule miRNome	-0.0418961	78
P01045.2	skim milk proteome	0.0418726	79
bta.miR.425.3p	fat globule miRNome	0.0418593	80
bta.miR.223	whole milk miRNome	0.0418538	81
Actin, alpha skeletal muscle	skim milk proteome	0.0418136	82
bta.chr3_32653_mt	fat globule miRNome	-0.0417336	83
ocu.miR.191.3p	fat globule miRNome	0.0415155	84
bta.miR.2419.5p	whole milk miRNome	-0.0415148	85
Uncharacterized protein	skim milk proteome	0.0409429	86
bta.miR.11991	whole milk miRNome	0.0408073	87
bta.chr16_12243_mt	fat globule miRNome	-0.0405908	88
bta.chr18_15217_mt	fat globule miRNome	-0.0405688	89
mmu.miR.210.5p	fat globule miRNome	0.0405233	90
mmu.miR.200b.5p	whole milk miRNome	-0.0403894	91
Alpha-2-macroglobulin variant 22	skim milk proteome	0.0403658	92
bta.miR.22.3p	whole milk miRNome	-0.0403459	93
bta.chr5_35290_mt	fat globule miRNome	-0.0401081	94
chi.miR.708.3p	whole milk miRNome	0.0400013	95
bta.chr16_12513_mt	fat globule miRNome	-0.0399383	96
bta.miR.142.5p	whole milk miRNome	0.039909	97
Complement factor B	skim milk proteome	0.0396798	98
Chitinase-3-like protein 1	skim milk proteome	0.0396738	99
bta.chr17_13327_mt	whole milk miRNome	-0.0396189	100
bta.chr10_2366_mt	fat globule miRNome	-0.0396104	101
hsa.miR.491.3p	fat globule miRNome	0.0395168	102
ocu.miR.141.5p	fat globule miRNome	-0.0394636	103
bta.chr21_21585_mt	fat globule miRNome	-0.039429	104
bta.miR.1260b	fat globule miRNome	0.0393734	105
bta.miR.324	whole milk miRNome	0.0393505	106
bta.miR.141	fat globule miRNome	-0.0393437	107
Uncharacterized protein	skim milk proteome	0.0392135	108
efu.miR.500	whole milk miRNome	-0.0391565	109
bta.miR.2285ae	fat globule miRNome	0.0390812	110
bta.chr14_9261_mt	fat globule miRNome	-0.0390461	111
bta.miR.2904	fat globule miRNome	-0.0389939	112
ssc.miR.24.1.5p	whole milk miRNome	0.0388434	113
bta.miR.2284k	fat globule miRNome	0.0388408	114
Inter-alpha-trypsin inhibitor heavy chain H4	skim milk proteome	0.0388261	115
bta.miR.502b	whole milk miRNome	-0.0387635	116
bta.miR.15b	whole milk miRNome	0.0387311	117
Alpha-2-macroglobulin	skim milk proteome	0.0387089	118
bta.chr17_14031_mt	fat globule miRNome	-0.0386991	119
Uncharacterized protein	skim milk proteome	0.0386188	120
bta.chrX_44532_mt	fat globule miRNome	-0.0384377	121
bta.miR.375	whole milk miRNome	-0.0383549	122
bta.chr23_23885_mt	fat globule miRNome	0.0382354	123
bta.chr2_19984_mt	whole milk miRNome	0.0382182	124
bta.miR.125a	whole milk miRNome	-0.0381994	125
bta.miR.2284v	fat globule miRNome	0.0381145	126
bta.miR.11992	fat globule miRNome	0.0380996	127
bta.chr16_12255_mt	whole milk miRNome	-0.0380482	128
bta.miR.200a	fat globule miRNome	-0.0379478	129
bta.miR.10167.3p	whole milk miRNome	0.0379192	130
chi.miR.342.5p	fat globule miRNome	0.0378719	131
bta.chr19_17654_mt	whole milk miRNome	-0.03767	132
xla.miR.140.5p	whole milk miRNome	0.0376193	133
bta.chr7_41141_mt	fat globule miRNome	0.0375492	134
KRT15 protein	skim milk proteome	-0.0374962	135
bta.chr18_14520_mt	whole milk miRNome	-0.03734	136
bta.chr13_8096_mt	whole milk miRNome	0.037328	137
bta.chr12_6705_mt	whole milk miRNome	0.037219	138
hsa.miR.26b.3p	fat globule miRNome	0.0371132	139
bta.chr13_8148_mt	fat globule miRNome	-0.0370783	140
bta.chr16_12247_mt	fat globule miRNome	-0.036867	141
bta.chr6_38228_mt	whole milk miRNome	-0.0368544	142
bta.chr19_17201_mt	fat globule miRNome	-0.0367916	143
bta.miR.2285bi	fat globule miRNome	0.0367736	144
Serpin A3-2	skim milk proteome	0.0367364	145
Protein content	other	-0.0367051	146
bta.chr7_39490_mt	fat globule miRNome	-0.0366969	147
bta.chr16_12761_mt	fat globule miRNome	0.0366704	148
bta.chr22_23077_mt	fat globule miRNome	0.0366254	149
bta.chr9_43306_mt	whole milk miRNome	-0.0365466	150
bta.miR.504	fat globule miRNome	0.0365052	151
bta.chr12_6503_mt	fat globule miRNome	-0.0364784	152
bta.chr3_32262_mt	whole milk miRNome	-0.0362748	153
bta.miR.185	whole milk miRNome	0.0361516	154
bta.chr5_37319_mt	fat globule miRNome	0.0360503	155
bta.chr18_14655_mt	fat globule miRNome	0.035903	156
bta.miR.184	whole milk miRNome	-0.0357526	157
bta.miR.185	fat globule miRNome	0.035655	158
bta.chr26_27472_mt	fat globule miRNome	0.0355511	159
bta.chr11_4485_mt	fat globule miRNome	0.0355278	160
bta.miR.2285bz	whole milk miRNome	0.0355037	161
bta.miR.874	fat globule miRNome	0.0354702	162
bta.miR.2903	whole milk miRNome	0.0354561	163
bta.miR.874	whole milk miRNome	0.0354183	164
Uncharacterized protein	skim milk proteome	0.0353776	165
Histone H4	skim milk proteome	0.0353681	166
hsa.miR.31.3p	fat globule miRNome	0.0353064	167
bta.miR.296.5p	fat globule miRNome	0.03525	168
Uncharacterized protein	skim milk proteome	0.0352493	169
mmu.miR.30c.1.3p	fat globule miRNome	0.0352239	170
bta.chr21_21722_mt	fat globule miRNome	0.0351645	171
bta.miR.2285x	whole milk miRNome	0.035146	172
bta.chr10_2765_mt	fat globule miRNome	0.0350353	173
bta.chr5_35699_mt	whole milk miRNome	-0.0349379	174
mmu.miR.223.5p	whole milk miRNome	0.0349258	175
bta.chr8_41995_mt	fat globule miRNome	-0.0348962	176
bta.miR.11986c	fat globule miRNome	0.0348574	177
α-LA	other	-0.0348519	178
bta.chr3_32081_mt	fat globule miRNome	0.0348461	179
Uncharacterized protein	skim milk proteome	0.0348059	180
bta.miR.18a	whole milk miRNome	0.0347479	181
bta.miR.221	whole milk miRNome	0.0346731	182
bta.miR.4449	fat globule miRNome	0.0346334	183
bta.chr12_6917_mt	fat globule miRNome	0.0345499	184
bta.chr27_28458_mt	fat globule miRNome	0.0345438	185
bta.miR.11973	fat globule miRNome	0.034516	186
bta.miR.12059	fat globule miRNome	-0.0345018	187
chi.miR.502b.5p	whole milk miRNome	0.03445	188
Serpin A3-6	skim milk proteome	0.0344471	189
Vitamin D-binding protein	skim milk proteome	0.034415	190
bta.chr11_5627_mt	fat globule miRNome	0.0343503	191
bta.chr3_32023_mt	fat globule miRNome	-0.0343402	192
bta.miR.2284l	fat globule miRNome	0.0342413	193
bta.chr1_1683_mt	fat globule miRNome	-0.034235	194
bta.chr24_25155_mt	fat globule miRNome	0.034206	195
bta.chr1_90_mt	whole milk miRNome	-0.0341554	196
Endopin 2C	skim milk proteome	0.0341506	197
bta.miR.1271	whole milk miRNome	0.0341048	198
bta.let.7i	whole milk miRNome	0.0340899	199
bta.miR.2400	whole milk miRNome	0.0340616	200
bta.miR.6119.5p	fat globule miRNome	0.0340536	201
bta.chr18_15283_mt	whole milk miRNome	-0.0339558	202
hsa.miR.375.5p	fat globule miRNome	-0.0339418	203
bta.chr26_27472_mt	whole milk miRNome	0.0338638	204
bta.miR.12036	fat globule miRNome	-0.0338043	205
bta.miR.342	fat globule miRNome	0.0337496	206
BHB	other	-0.0337427	207
bta.chr5_35699_st	fat globule miRNome	-0.033723	208
bta.chr19_17086_mt	whole milk miRNome	-0.03358	209
hsa.miR.186.3p	whole milk miRNome	0.0335743	210
bta.miR.2904	whole milk miRNome	-0.0335701	211
bta.chr5_35995_mt	whole milk miRNome	-0.0334619	212
bta.miR.2285x	fat globule miRNome	0.0334538	213
bta.miR.2284d	fat globule miRNome	0.033367	214
bta.miR.10a	whole milk miRNome	0.0333475	215
Hemopexin	skim milk proteome	0.0333232	216
mmu.miR.188.3p	fat globule miRNome	-0.0332972	217
bta.chr7_40722_mt	whole milk miRNome	-0.0332033	218
bta.chr18_15321_mt	fat globule miRNome	0.0331759	219
bta.miR.140	fat globule miRNome	0.0331653	220
bta.miR.2285ao	fat globule miRNome	0.0331544	221
bta.miR.6123	fat globule miRNome	0.0331509	222
Fibrinogen alpha chain	skim milk proteome	0.0331285	223
Uncharacterized protein	skim milk proteome	0.0331198	224
bta.chr10_2979_mt	whole milk miRNome	-0.0331051	225
IGK protein	skim milk proteome	0.0330856	226
bta.chr3_32984_mt	fat globule miRNome	-0.0330614	227
hsa.miR.101.5p	whole milk miRNome	0.0330166	228
bta.miR.326	fat globule miRNome	0.033006	229
bta.miR.2285bj	fat globule miRNome	0.0328748	230
bta.chrX_45254_mt	fat globule miRNome	0.032853	231
bta.miR.146a	whole milk miRNome	0.032853	232
bta.miR.150	fat globule miRNome	0.0328498	233
bta.miR.3432a	whole milk miRNome	0.0328015	234
bta.miR.125a	fat globule miRNome	-0.0327992	235
bta.chr11_4147_mt	whole milk miRNome	-0.0327845	236
bta.miR.2285aa	whole milk miRNome	0.0327302	237
bta.chr19_17763_mt	fat globule miRNome	0.0326723	238
rno.miR.338.5p	fat globule miRNome	0.032654	239
bta.chr17_13483_mt	whole milk miRNome	0.0326328	240
bta.miR.28	whole milk miRNome	-0.0325863	241
bta.miR.146b	whole milk miRNome	0.0325337	242
β-CN	other	-0.0325293	243
bta.chr23_24265_mt	fat globule miRNome	-0.0324773	244
αs2-CN	other	-0.0324263	245
bta.miR.25	whole milk miRNome	0.032411	246
bta.miR.10b	whole milk miRNome	0.0323612	247
bta.chr10_2366_mt	whole milk miRNome	-0.0323364	248
bta.miR.340	whole milk miRNome	-0.0323216	249
bta.miR.2411.3p	fat globule miRNome	0.0322929	250
bta.chr7_41141_mt	whole milk miRNome	0.0322509	251
bta.miR.652	whole milk miRNome	0.0322479	252
bta.chrX_44708_mt	fat globule miRNome	0.0321957	253
hsa.miR.361.3p	whole milk miRNome	-0.032179	254
Cathepsin D	skim milk proteome	0.0321659	255
Pancreatic adenocarcinoma upregulated factor-like	skim milk proteome	0.0321514	256
Uncharacterized protein	skim milk proteome	0.0321363	257
bta.chr10_2969_mt	fat globule miRNome	0.032127	258
bta.miR.2284f	fat globule miRNome	0.0320429	259
bta.miR.375	fat globule miRNome	-0.0320346	260
αs1-CN	other	-0.0320144	261
qpcr_423	other	0.0320029	262
bta.chr3_31800_mt	whole milk miRNome	0.0319369	263
Uncharacterized protein	skim milk proteome	-0.0319275	264
DnaJ homolog subfamily C member 3	skim milk proteome	0.031904	265
bta.miR.424.5p	whole milk miRNome	0.0319017	266
bta.chr14_9640_mt	whole milk miRNome	-0.0318507	267
Fibrinogen beta chain	skim milk proteome	0.0318419	268
bta.miR.106b	whole milk miRNome	0.031838	269
bta.chr25_26350_mt	fat globule miRNome	-0.0318364	270
bta.chr10_2620_st	fat globule miRNome	0.0318345	271
bta.chr4_34135_st	whole milk miRNome	-0.031831	272
bta.miR.2284g	fat globule miRNome	0.0318276	273
bta.chrX_44708_mt	whole milk miRNome	0.0317177	274
bta.miR.378d	fat globule miRNome	0.0316886	275
bta.chr16_12378_mt	fat globule miRNome	-0.0316767	276
bta.chr9_43183_mt	fat globule miRNome	-0.0316767	277
bta.chr2_20240_mt	fat globule miRNome	-0.0316767	278
bta.miR.155	whole milk miRNome	0.0316273	279
bta.chr16_12243_mt	whole milk miRNome	-0.0315871	280
bta.chr18_15217_mt	whole milk miRNome	-0.0315817	281
bta.miR.188	whole milk miRNome	0.0315646	282
bta.chr1_77_mt	whole milk miRNome	0.0315467	283
bta.miR.2443	fat globule miRNome	-0.0314996	284
bta.miR.378b	fat globule miRNome	0.0314888	285
bta.miR.18b	whole milk miRNome	0.0314781	286
bta.miR.2284c	whole milk miRNome	0.0314022	287
bta.miR.2284a	fat globule miRNome	0.0313715	288
bta.chr15_10987_mt	fat globule miRNome	0.0313654	289
bta.chr1_1499_mt	fat globule miRNome	0.031364	290
bta.chr2_18731_st	fat globule miRNome	0.0312601	291
bta.miR.99b	whole milk miRNome	-0.0312438	292
bta.chr18_14655_mt	whole milk miRNome	0.0312302	293
bta.chr7_39836_mt	fat globule miRNome	-0.0312051	294
bta.miR.6525	fat globule miRNome	0.0311701	295
bta.chr5_36436_mt	fat globule miRNome	-0.0311297	296
bta.miR.2285cf	fat globule miRNome	0.0310526	297
bta.miR.378	fat globule miRNome	0.0310012	298
bta.chr24_25036_mt	fat globule miRNome	-0.0309911	299
bta.miR.2285bh	fat globule miRNome	0.0309768	300
bta.miR.2285e	whole milk miRNome	0.0309679	301
bta.chr5_36466_mt	fat globule miRNome	0.0309104	302
bta.miR.2284v	whole milk miRNome	0.0308557	303
bta.chr3_33291_mt	whole milk miRNome	-0.0308427	304
bta.chr3_32572_mt	fat globule miRNome	-0.0308056	305
rno.miR.27b.5p	whole milk miRNome	-0.0307668	306
bta.miR.2285p	fat globule miRNome	0.0307616	307
bta.chr26_27472_st	whole milk miRNome	0.0307547	308
bta.chr9_43104_mt	fat globule miRNome	-0.0307428	309
bta.chr21_21521_mt	whole milk miRNome	-0.0307173	310
bta.miR.2284aa	fat globule miRNome	0.0306703	311
bta.chr21_21919_mt	whole milk miRNome	-0.030555	312
bta.miR.2284c	fat globule miRNome	0.0305524	313
Histone H2B	skim milk proteome	0.0305486	314
bta.chr12_6379_mt	fat globule miRNome	0.0305459	315
bta.miR.769	fat globule miRNome	0.0305181	316
G protein subunit alpha i2	skim milk proteome	0.0305064	317
G protein subunit alpha i3	skim milk proteome	0.0305064	318
bta.chr19_15944_mt	fat globule miRNome	-0.0305048	319
mmu.miR.132.5p	fat globule miRNome	0.030476	320
aca.miR.26.3p	whole milk miRNome	0.0304681	321
bta.miR.210	fat globule miRNome	0.030468	322
bta.chr20_20709_mt	fat globule miRNome	-0.0304198	323
bta.chr19_17421_mt	whole milk miRNome	-0.0304125	324
bta.miR.2285b	whole milk miRNome	0.0303475	325
bta.miR.2285p	whole milk miRNome	0.0303426	326
bta.chr1_1499_mt	whole milk miRNome	0.0303358	327
bta.chr13_7841_mt	whole milk miRNome	0.0303043	328
bta.miR.429	fat globule miRNome	-0.0302929	329
Perilipin-2	skim milk proteome	0.0302443	330
bta.chrUn_GJ059508v1_44427_mt	fat globule miRNome	0.0302404	331
bta.miR.2284aa	whole milk miRNome	0.0302134	332
bta.miR.2284z	whole milk miRNome	0.0301776	333
Histone H2B type 1	skim milk proteome	0.0301484	334
bta.miR.3613a	fat globule miRNome	-0.0301408	335
bta.chr12_6398_mt	fat globule miRNome	-0.0301287	336
hsa.miR.652.5p	whole milk miRNome	0.0301013	337
bta.chr19_16778_mt	fat globule miRNome	0.0300773	338
bta.chr2_20008_mt	fat globule miRNome	0.0300639	339
bta.chr2_18956_mt	whole milk miRNome	0.0300562	340
bta.miR.381	whole milk miRNome	0.0300354	341
hsa.miR.29a.5p	fat globule miRNome	0.0300202	342
Lipoprotein lipase	skim milk proteome	-0.0300031	343
bta.chr26_27472_st	fat globule miRNome	0.0299266	344
bta.miR.2457	whole milk miRNome	0.0298837	345
bta.miR.2285cl	whole milk miRNome	0.0298437	346
bta.chr12_6255_mt	fat globule miRNome	-0.0298064	347
bta.miR.99a.5p	fat globule miRNome	-0.0298003	348
bta.miR.9851	fat globule miRNome	-0.0297864	349
Peptidyl-prolyl cis-trans isomerase A	skim milk proteome	0.0297823	350
Fibrinogen gamma-B chain	skim milk proteome	0.0297228	351
bta.miR.296.3p	fat globule miRNome	0.0296969	352
Fat content	other	0.0296775	353
bta.miR.2285r	fat globule miRNome	0.0296472	354
bta.chr10_3038_mt	whole milk miRNome	-0.0296444	355
Fatty acid synthase	skim milk proteome	0.0296364	356
bta.chr12_6810_mt	whole milk miRNome	0.029615	357
bta.chr4_33919_mt	whole milk miRNome	0.0295986	358
bta.chr3_31800_mt	fat globule miRNome	0.0295514	359
bta.chr20_20915_mt	fat globule miRNome	0.0295296	360
Perilipin	skim milk proteome	0.0295271	361
bta.miR.425.3p	whole milk miRNome	0.0294983	362
bta.miR.2284o	fat globule miRNome	0.0294753	363
bta.miR.2285r	whole milk miRNome	0.0294412	364
bta.miR.885	fat globule miRNome	0.0294217	365
bta.miR.425.5p	fat globule miRNome	0.0294215	366
bta.miR.2285bo	fat globule miRNome	0.0294165	367
bta.miR.2285cd	fat globule miRNome	0.0294109	368
bta.chr21_21585_mt	whole milk miRNome	-0.0294092	369
bta.chr6_38867_mt	fat globule miRNome	0.0293893	370
bta.chr23_24265_mt	whole milk miRNome	-0.0293877	371
bta.chr12_6705_mt	fat globule miRNome	0.0293837	372
bta.miR.6120.3p	fat globule miRNome	0.0293715	373
bta.chr9_43846_mt	whole milk miRNome	-0.0293453	374
bta.miR.132	whole milk miRNome	0.0293411	375
bta.miR.96	fat globule miRNome	-0.0292823	376
bta.chr12_6175_mt	fat globule miRNome	0.0292355	377
bta.chr21_22072_mt	whole milk miRNome	0.0292298	378
bta.chr2_18956_mt	fat globule miRNome	0.0291979	379
bta.chr10_2670_mt	fat globule miRNome	0.0291813	380
bta.chr18_14373_mt	whole milk miRNome	-0.0291479	381
bta.chr15_11007_st	fat globule miRNome	0.0290916	382
bta.miR.2312	whole milk miRNome	0.0290593	383
Uncharacterized protein	skim milk proteome	0.0290389	384
bta.miR.30a.5p	fat globule miRNome	-0.0289803	385
Fibronectin	skim milk proteome	0.0289803	386
bta.chr10_2620_st	whole milk miRNome	0.0289424	387
bta.miR.2285bz	fat globule miRNome	0.0289408	388
bta.miR.2284r	whole milk miRNome	0.0289313	389
bta.miR.331.5p	whole milk miRNome	0.0289203	390
bta.miR.222	fat globule miRNome	0.0288782	391
bta.chr24_25183_mt	fat globule miRNome	0.0288228	392
bta.chr10_2443_mt	fat globule miRNome	-0.0288129	393
bta.chr10_2969_st	fat globule miRNome	-0.0287379	394
bta.miR.11987	fat globule miRNome	-0.028705	395
bta.miR.652	fat globule miRNome	0.0286885	396
bta.miR.2285al.5p	fat globule miRNome	0.0286629	397
hsa.let.7c.3p	fat globule miRNome	-0.0286362	398
Glycoprotein 2	skim milk proteome	0.0286219	399
bta.miR.125b	fat globule miRNome	-0.0286087	400
bta.chr14_9211_mt	whole milk miRNome	-0.0285911	401
bta.miR.211	fat globule miRNome	0.0285275	402
bta.miR.7862	fat globule miRNome	0.0285155	403
bta.miR.2285dj	fat globule miRNome	-0.0285002	404
bta.miR.1306	whole milk miRNome	0.0284806	405
bta.miR.2284k	whole milk miRNome	0.0284247	406
bta.chr4_34393_mt	fat globule miRNome	-0.0284137	407
Lactotransferrin	skim milk proteome	0.0284063	408
Lactoferrin	skim milk proteome	0.0284063	409
bta.miR.193b	fat globule miRNome	-0.0283839	410
bta.chr11_5392_mt	whole milk miRNome	0.0283532	411
bta.chr7_39889_mt	fat globule miRNome	0.028341	412
bta.miR.149.5p	fat globule miRNome	0.0283388	413
bta.miR.2284u	whole milk miRNome	0.0283233	414
Cathelicidin-1	skim milk proteome	0.0283205	415
Lysosomal alpha-mannosidase	skim milk proteome	0.0282908	416
bta.miR.2424	whole milk miRNome	0.0282803	417
bta.miR.2284z	fat globule miRNome	0.0282732	418
hsa.miR.30d.3p	whole milk miRNome	-0.028257	419
bta.miR.2284x	whole milk miRNome	0.0282446	420
bta.chr10_2962_mt	whole milk miRNome	0.0282446	421
bta.chr11_4147_mt	fat globule miRNome	-0.0282378	422
hsa.miR.532.3p	fat globule miRNome	0.0282252	423
Annexin	skim milk proteome	0.0282162	424
bta.chr13_7841_mt	fat globule miRNome	0.0281841	425
bta.chr19_17870_mt	fat globule miRNome	-0.0281638	426
bta.chrX_45254_mt	whole milk miRNome	0.0281601	427
bta.chr22_22618_mt	fat globule miRNome	0.0280604	428
bta.miR.99a.3p	whole milk miRNome	0.0280571	429
bta.chrX_44786_mt	fat globule miRNome	0.0280534	430
bta.chr3_33134_mt	whole milk miRNome	0.0280054	431
bta.miR.2313.3p	fat globule miRNome	0.0279983	432
bta.miR.2285k	whole milk miRNome	0.0279602	433
bta.miR.449a	fat globule miRNome	0.027951	434
bta.miR.143	whole milk miRNome	-0.0279125	435
bta.miR.2340	fat globule miRNome	-0.0278911	436
Isocitrate dehydrogenase [NADP]	skim milk proteome	0.0278851	437
bta.miR.12016	fat globule miRNome	-0.0278564	438
Serpin A3-3	skim milk proteome	0.0277894	439
bta.miR.2285co	whole milk miRNome	0.027788	440
bta.chr15_10073_mt	fat globule miRNome	0.0277686	441
bta.miR.16a	whole milk miRNome	0.0277674	442
mmu.let.7i.3p	whole milk miRNome	0.0277637	443
hsa.miR.125b.2.3p	whole milk miRNome	-0.0277555	444
bta.miR.24.3p	whole milk miRNome	0.0277435	445
hsa.miR.365b.5p	fat globule miRNome	0.0276983	446
bta.miR.190a	fat globule miRNome	-0.0276788	447
bta.chr6_38193_mt	fat globule miRNome	-0.0276455	448
bta.chrUn_GJ057397v1_44378_mt	fat globule miRNome	-0.027629	449
bta.miR.545.3p	whole milk miRNome	0.0276264	450
bta.chr26_28376_mt	fat globule miRNome	-0.0275997	451
bta.miR.11986b	fat globule miRNome	-0.0275921	452
bta.miR.193a.3p	whole milk miRNome	0.0275782	453
bta.miR.505	fat globule miRNome	0.0275706	454
bta.chr21_21988_mt	whole milk miRNome	-0.0275673	455
bta.miR.2285ci	whole milk miRNome	0.0275538	456
Cadherin-1	skim milk proteome	0.0275531	457
bta.miR.138	fat globule miRNome	0.0275411	458
bta.chr20_20849_mt	whole milk miRNome	-0.0274996	459
bta.chr10_2979_mt	fat globule miRNome	-0.0274391	460
Peptidoglycan recognition protein 1	skim milk proteome	0.0274246	461
bta.miR.432	fat globule miRNome	0.0273895	462
bta.miR.2285g	fat globule miRNome	0.027385	463
bta.miR.744	whole milk miRNome	0.0273643	464
Osteopontin	skim milk proteome	-0.0273191	465
bta.chr24_25645_mt	whole milk miRNome	-0.0273059	466
bta.miR.6775	whole milk miRNome	0.0272595	467
bta.chr25_25976_mt	whole milk miRNome	-0.0272487	468
bta.chr14_9211_mt	fat globule miRNome	-0.0272391	469
bta.miR.96	whole milk miRNome	-0.0272043	470
bta.chr18_14373_mt	fat globule miRNome	-0.0272036	471
bta.chr23_23863_mt	fat globule miRNome	0.0271589	472
bta.chrX_45078_mt	whole milk miRNome	-0.0271476	473
ssc.miR.24.1.5p	fat globule miRNome	0.0270786	474
bta.miR.760.5p	whole milk miRNome	0.0270559	475
bta.chr5_36214_mt	fat globule miRNome	0.0270496	476
bta.miR.11986c	whole milk miRNome	0.0270286	477
bta.chr7_40156_mt	fat globule miRNome	-0.0270235	478
bta.chr7_41090_mt	whole milk miRNome	-0.0270074	479
bta.miR.2887	fat globule miRNome	-0.0269546	480
isocitrate	other	0.0269454	481
bta.miR.2284o	whole milk miRNome	0.0269396	482
bta.miR.26b	whole milk miRNome	0.0268934	483
bta.miR.100	fat globule miRNome	-0.0268639	484
bta.chr16_11958_mt	fat globule miRNome	-0.0268468	485
bta.chr11_4485_mt	whole milk miRNome	0.0268194	486
hsa.miR.33b.3p	whole milk miRNome	-0.0267998	487
bta.chr25_25914_mt	fat globule miRNome	-0.0267993	488
bta.chr8_42619_st	whole milk miRNome	0.0267077	489
bta.miR.152	fat globule miRNome	-0.0267043	490
hsa.miR.671.3p	fat globule miRNome	0.0266995	491
bta.miR.2285ae	whole milk miRNome	0.0266915	492
bta.miR.677	whole milk miRNome	0.0266558	493
bta.miR.660	whole milk miRNome	-0.0266387	494
bta.miR.148b	whole milk miRNome	0.0266088	495
bta.miR.454	whole milk miRNome	0.0265977	496
bta.chr23_24307_mt	whole milk miRNome	-0.0265558	497
bta.miR.378c	fat globule miRNome	0.0265375	498
bta.chr12_6398_mt	whole milk miRNome	-0.0265211	499
Apolipoprotein E	skim milk proteome	0.0265062	500
bta.miR.2285bl	whole milk miRNome	0.0264708	501
Uncharacterized protein	skim milk proteome	0.0264698	502
bta.miR.2403	fat globule miRNome	0.0264256	503
bta.chr25_25934_mt	whole milk miRNome	-0.0264106	504
bta.miR.221	fat globule miRNome	0.0263928	505
bta.chr4_34393_mt	whole milk miRNome	-0.0263843	506
bta.miR.16b	whole milk miRNome	0.0263774	507
hsa.miR.378e	fat globule miRNome	0.0263598	508
bta.miR.2284w	fat globule miRNome	0.0263464	509
bta.chr15_11318_mt	fat globule miRNome	-0.0263461	510
Beta-2-microglobulin	skim milk proteome	0.0263275	511
bta.miR.677	fat globule miRNome	0.0262725	512
bta.chr24_25656_mt	whole milk miRNome	0.026265	513
bta.chr9_43262_mt	fat globule miRNome	0.0262433	514
bta.chr23_23863_mt	whole milk miRNome	0.0262366	515
bta.miR.328	fat globule miRNome	0.0262285	516
bta.chr17_13703_mt	whole milk miRNome	-0.0262269	517
bta.miR.27b	fat globule miRNome	-0.0260736	518
bta.miR.362.5p	fat globule miRNome	0.0260585	519
bta.chrUn_GJ059508v1_44427_mt	whole milk miRNome	0.0260277	520
bta.miR.505	whole milk miRNome	0.0260179	521
bta.miR.2284m	fat globule miRNome	0.0260146	522
bta.chr19_17749_mt	fat globule miRNome	-0.0260054	523
bta.miR.2332	fat globule miRNome	0.0258706	524
mdo.miR.32.3p	whole milk miRNome	0.0258661	525
bta.miR.2419.5p	fat globule miRNome	-0.0258579	526
Butyrophilin subfamily 1 member A1	skim milk proteome	0.0258421	527
bta.miR.34a	whole milk miRNome	0.0258298	528
bta.miR.449b	fat globule miRNome	0.0258208	529
mmu.miR.181a.2.3p	whole milk miRNome	-0.0258141	530
bta.chr29_30622_mt	fat globule miRNome	0.0257836	531
bta.miR.2285cy	whole milk miRNome	0.0257823	532
Ras-related C3 botulinum toxin substrate 2	skim milk proteome	0.0257726	533
bta.chr3_31445_mt	fat globule miRNome	-0.0257424	534
rno.miR.330.5p	fat globule miRNome	0.0257345	535
bta.miR.2284d	whole milk miRNome	0.0257097	536
bta.miR.3432b	fat globule miRNome	0.0257025	537
bta.miR.20a	whole milk miRNome	0.0256948	538
Pyruvate kinase	skim milk proteome	0.025683	539
bta.miR.2285bs	fat globule miRNome	0.0256699	540
bta.chr29_30418_mt	whole milk miRNome	-0.0256645	541
bta.miR.130b	whole milk miRNome	0.0256271	542
bta.chr14_9464_mt	whole milk miRNome	-0.0255634	543
bta.chr23_23885_mt	whole milk miRNome	0.0254841	544
bta.chr12_6401_mt	fat globule miRNome	-0.0254429	545
bta.miR.2285al.5p	whole milk miRNome	0.0253858	546
bta.miR.2285n	whole milk miRNome	0.0253497	547
bta.miR.6524	fat globule miRNome	-0.025343	548
bta.miR.11999	fat globule miRNome	0.0253382	549
bta.chr3_31800_st	whole milk miRNome	0.0253234	550
bta.chr12_6175_st	fat globule miRNome	0.0253206	551
bta.miR.502a	fat globule miRNome	-0.0252837	552
bta.miR.2340	whole milk miRNome	-0.0252829	553
P04896.2	skim milk proteome	0.0252678	554
bta.miR.2411.3p	whole milk miRNome	0.0252397	555
bta.miR.6529a	fat globule miRNome	0.0252303	556
bta.miR.2299.5p	whole milk miRNome	0.025213	557
bta.miR.12014	whole milk miRNome	0.0252087	558
bta.chr22_23306_mt	whole milk miRNome	0.0251914	559
mmu.miR.136.3p	fat globule miRNome	-0.0251708	560
bta.miR.2285au	fat globule miRNome	0.0251511	561
bta.chr20_20651_mt	whole milk miRNome	0.0251391	562
bta.chr25_26974_mt	fat globule miRNome	0.0251328	563
bta.chr20_20929_mt	whole milk miRNome	0.0251169	564
bta.chr14_8486_mt	whole milk miRNome	0.0251049	565
bta.miR.574	whole milk miRNome	0.0250949	566
Lactotransferrin (Fragment)	skim milk proteome	0.0250941	567
bta.miR.21.3p	whole milk miRNome	0.0250501	568
bta.miR.2285ce	whole milk miRNome	0.0250383	569
bta.miR.2285bj	whole milk miRNome	0.0249504	570
bta.miR.2285e	fat globule miRNome	0.0249254	571
bta.chr7_39157_mt	fat globule miRNome	0.0249172	572
Uncharacterized protein	skim milk proteome	0.0248878	573
ssc.miR.374b.3p	whole milk miRNome	0.0248857	574
bta.miR.582	whole milk miRNome	0.0248827	575
bta.chr12_6503_mt	whole milk miRNome	-0.0248813	576
bta.chr21_21821_mt	fat globule miRNome	-0.0248745	577
bta.miR.27a.3p	fat globule miRNome	-0.0248734	578
Uncharacterized protein	skim milk proteome	0.0248577	579
bta.miR.2285bb	whole milk miRNome	0.0248456	580
bta.chr13_8148_mt	whole milk miRNome	-0.024814	581
bta.miR.2285br	whole milk miRNome	0.0247967	582
bta.miR.2285bc	fat globule miRNome	0.0247936	583
bta.miR.11998	fat globule miRNome	-0.0247914	584
bta.chr20_20763_mt	fat globule miRNome	0.0247764	585
bta.miR.192	fat globule miRNome	0.0247389	586
bta.chr18_14730_mt	whole milk miRNome	0.0247329	587
Uncharacterized protein	skim milk proteome	-0.0245922	588
bta.miR.6522	whole milk miRNome	-0.0245836	589
bta.chr18_14289_mt	fat globule miRNome	-0.0245831	590
oan.miR.454.5p	fat globule miRNome	0.0245697	591
bta.chr5_36477_mt	whole milk miRNome	0.0245627	592
bta.chrX_45359_mt	fat globule miRNome	-0.0245403	593
bta.miR.22.5p	fat globule miRNome	0.0245233	594
bta.miR.200b	fat globule miRNome	-0.0244701	595
Keratin, type I cytoskeletal 10	skim milk proteome	-0.0244603	596
hsa.miR.103a.2.5p	fat globule miRNome	0.0244353	597
bta.miR.19b	whole milk miRNome	0.0244004	598
Ras-related protein Rap-1b	skim milk proteome	0.0243415	599
bta.chr15_10097_mt	fat globule miRNome	0.0243386	600
mmu.miR.145a.3p	whole milk miRNome	0.0243195	601
bta.miR.2285dd	whole milk miRNome	0.0243006	602
bta.miR.2285da	whole milk miRNome	0.0242976	603
rno.miR.324.3p	whole milk miRNome	-0.024285	604
cli.miR.16a.3p	whole milk miRNome	0.0241629	605
bta.chr2_19984_mt	fat globule miRNome	0.0241286	606
bta.chr28_29278_mt	whole milk miRNome	0.0241214	607
bta.chr21_22093_mt	whole milk miRNome	-0.0241144	608
bta.miR.296.5p	whole milk miRNome	0.0241042	609
qpcr_486	other	0.0241018	610
bta.miR.205	whole milk miRNome	0.0240626	611
bta.miR.1468	whole milk miRNome	-0.0240566	612
bta.chr22_22845_mt	fat globule miRNome	0.0240539	613
bta.chr5_35357_mt	fat globule miRNome	0.0240459	614
bta.chr25_25940_mt	fat globule miRNome	0.0240189	615
Moesin	skim milk proteome	0.0240057	616
bta.miR.196a	whole milk miRNome	0.0240002	617
bta.miR.93	whole milk miRNome	0.0239448	618
Endoplasmic reticulum chaperone BiP	skim milk proteome	0.0239361	619
bta.miR.130b	fat globule miRNome	0.0238503	620
bta.chr6_38797_mt	fat globule miRNome	-0.0238449	621
mmu.miR.877.3p	fat globule miRNome	-0.023842	622
bta.miR.200b	whole milk miRNome	-0.0238368	623
bta.miR.365.3p	fat globule miRNome	-0.0238037	624
bta.chr10_2670_st	fat globule miRNome	0.0237934	625
qpcr_7g	other	0.023765	626
IGL@ protein	skim milk proteome	0.0237582	627
bta.chr22_23082_mt	fat globule miRNome	-0.0237158	628
Mucin-15	skim milk proteome	0.0236957	629
bta.chr3_33216_mt	whole milk miRNome	0.0236817	630
bta.miR.2285b	fat globule miRNome	0.0236766	631
bta.miR.2285au	whole milk miRNome	0.0236756	632
bta.miR.101	whole milk miRNome	0.023671	633
bta.chr15_10637_mt	fat globule miRNome	0.0236591	634
bta.miR.2285bu	whole milk miRNome	0.0236034	635
bta.miR.2284p	fat globule miRNome	0.0235924	636
bta.miR.11974	fat globule miRNome	-0.0235882	637
bta.chr29_29981_mt	whole milk miRNome	0.0235803	638
bta.chr26_28107_mt	whole milk miRNome	0.0235717	639
chi.miR.708.3p	fat globule miRNome	0.0235703	640
Immunoglobulin light chain, lambda gene cluster	skim milk proteome	0.0235257	641
bta.miR.186	whole milk miRNome	-0.0235196	642
bta.chr5_35899_mt	whole milk miRNome	0.0235179	643
bta.chr22_23306_mt	fat globule miRNome	0.0234842	644
bta.chr8_41526_st	whole milk miRNome	-0.0234595	645
bta.chr18_14524_mt	whole milk miRNome	0.0234509	646
Kappa-casein	skim milk proteome	0.023444	647
bta.miR.130a	whole milk miRNome	0.0234232	648
pal.miR.18a.3p	fat globule miRNome	0.0234044	649
bta.miR.2478	whole milk miRNome	-0.023392	650
bta.miR.31	fat globule miRNome	0.0233893	651
bta.miR.2285q	fat globule miRNome	0.0233781	652
bta.chrX_45480_mt	whole milk miRNome	-0.0233649	653
bta.chr4_34131_mt	fat globule miRNome	-0.0233507	654
bta.miR.30d	fat globule miRNome	-0.0233311	655
bta.miR.19a	whole milk miRNome	0.0233285	656
bta.miR.3613a	whole milk miRNome	0.0233211	657
bta.chr17_13968_mt	whole milk miRNome	-0.0232827	658
bta.miR.30e.5p	fat globule miRNome	-0.0232794	659
mmu.miR.107.5p	fat globule miRNome	0.0232711	660
bta.chr29_30423_mt	whole milk miRNome	-0.0232613	661
bta.chr9_43262_mt	whole milk miRNome	0.02321	662
bta.chr10_3376_mt	fat globule miRNome	-0.0232006	663
bta.miR.2285ab	whole milk miRNome	0.0231926	664
bta.chr8_42367_st	whole milk miRNome	0.0231748	665
bta.chr22_22618_mt	whole milk miRNome	0.0231703	666
bta.miR.2285v	fat globule miRNome	0.0231654	667
bta.miR.10b	fat globule miRNome	0.0231627	668
bta.chr5_37163_mt	fat globule miRNome	-0.0231597	669
bta.chr17_13733_st	fat globule miRNome	0.023156	670
bta.miR.196b	whole milk miRNome	0.0231363	671
bta.chr10_2469_mt	fat globule miRNome	-0.0231357	672
bta.chr4_34076_mt	fat globule miRNome	-0.0231057	673
rno.miR.421.5p	whole milk miRNome	0.0230787	674
bta.chr24_25524_mt	fat globule miRNome	0.0230596	675
bta.miR.10174.3p	whole milk miRNome	0.023054	676
bta.chr10_2135_mt	whole milk miRNome	-0.0230451	677
bta.chrX_45642_mt	fat globule miRNome	0.0230168	678
bta.chr8_42071_mt	fat globule miRNome	0.0230095	679
bta.chr11_5260_mt	fat globule miRNome	0.0230035	680
bta.chr7_39207_mt	fat globule miRNome	-0.0229866	681
bta.miR.12058	fat globule miRNome	0.0229816	682
Uncharacterized protein	skim milk proteome	0.0229623	683
bta.miR.935	fat globule miRNome	0.0229196	684
bta.chr21_22200_mt	fat globule miRNome	-0.0229077	685
bta.chr4_34757_mt	fat globule miRNome	0.0228957	686
mmu.miR.29b.2.5p	fat globule miRNome	0.0228522	687
bta.miR.215	fat globule miRNome	0.0228253	688
bta.chr19_17870_mt	whole milk miRNome	0.0228176	689
P08037.2	skim milk proteome	0.0227934	690
SCC	other	0.0227844	691
bta.chr15_10874_mt	fat globule miRNome	-0.0227678	692
chi.miR.3432.3p	fat globule miRNome	0.0227621	693
bta.miR.2285bo	whole milk miRNome	0.0227547	694
bta.miR.182	fat globule miRNome	-0.0227366	695
bta.miR.34a	fat globule miRNome	0.0227192	696
Kappa casein (Fragment)	skim milk proteome	0.0226571	697
bta.chr5_36762_mt	fat globule miRNome	0.0226255	698
bta.miR.301a	fat globule miRNome	0.0226142	699
bta.let.7g	whole milk miRNome	0.0225338	700
bta.miR.380.3p	whole milk miRNome	-0.0225278	701
Ezrin	skim milk proteome	0.0225021	702
bta.miR.574	fat globule miRNome	-0.0224889	703
bta.miR.10a	fat globule miRNome	0.0224693	704
bta.miR.99a.3p	fat globule miRNome	-0.0224621	705
bta.chr18_15901_mt	fat globule miRNome	0.0224612	706
bta.miR.19b	fat globule miRNome	0.0224562	707
bta.chr10_2670_mt	whole milk miRNome	0.0224283	708
bta.miR.2285m	whole milk miRNome	0.0224123	709
Histone H2A type 2-C	skim milk proteome	0.0223826	710
bta.chr8_41777_mt	fat globule miRNome	-0.0223753	711
bta.miR.339a	fat globule miRNome	0.0223555	712
efu.miR.30a	fat globule miRNome	-0.0223092	713
bta.chr1_339_mt	fat globule miRNome	-0.0222932	714
bta.chr1_451_mt	whole milk miRNome	0.0222837	715
bta.miR.2285dh	whole milk miRNome	0.0222813	716
bta.chr23_24366_mt	fat globule miRNome	-0.0222635	717
bta.miR.150	whole milk miRNome	0.0222488	718
bta.chr13_7199_mt	whole milk miRNome	-0.0222418	719
bta.chr11_4230_st	fat globule miRNome	0.0222296	720
bta.miR.129	whole milk miRNome	0.0221893	721
bta.miR.2332	whole milk miRNome	0.0221389	722
bta.chr25_25879_mt	fat globule miRNome	0.022134	723
bta.chr3_32263_mt	fat globule miRNome	0.0221297	724
bta.chr1_1228_mt	whole milk miRNome	0.022126	725
bta.miR.99b	fat globule miRNome	-0.0221197	726
bta.miR.193a.5p	whole milk miRNome	0.0221074	727
bta.chr1_1342_mt	fat globule miRNome	0.0221054	728
bta.miR.2285j	fat globule miRNome	0.0220877	729
bta.miR.451	whole milk miRNome	0.0220667	730
bta.chr2_18731_st	whole milk miRNome	0.0220661	731
gga.miR.18b.3p	fat globule miRNome	0.0220378	732
bta.miR.11987	whole milk miRNome	-0.0219781	733
bta.miR.1388.5p	fat globule miRNome	0.0219568	734
bta.chr15_10546_mt	fat globule miRNome	0.0219517	735
bta.miR.11984	whole milk miRNome	0.0219416	736
bta.miR.2285ca	fat globule miRNome	0.0219379	737
bta.chr11_3925_mt	whole milk miRNome	0.0218894	738
bta.miR.545.5p	whole milk miRNome	0.0218829	739
bta.chr6_38867_mt	whole milk miRNome	0.0218731	740
bta.chr11_5512_mt	fat globule miRNome	0.0218559	741
bta.chr10_2298_mt	whole milk miRNome	-0.0218523	742
hsa.miR.148a.5p	whole milk miRNome	-0.0218345	743
Uncharacterized protein	skim milk proteome	0.0218266	744
bta.chr25_26935_mt	fat globule miRNome	-0.0217883	745
bta.miR.2285dl.3p	whole milk miRNome	0.0217815	746
bta.chr9_43050_st	whole milk miRNome	0.0217808	747
bta.miR.2312	fat globule miRNome	0.0217337	748
bta.chr25_26797_mt	whole milk miRNome	0.0217156	749
bta.miR.148a	whole milk miRNome	-0.0216912	750
bta.miR.204	fat globule miRNome	0.0216519	751
bta.miR.33a	whole milk miRNome	0.0216456	752
hsa.miR.92a.1.5p	whole milk miRNome	-0.0216283	753
bta.chr24_25036_mt	whole milk miRNome	-0.0216059	754
bta.miR.2448.3p	fat globule miRNome	0.0215778	755
bta.miR.29d.5p	fat globule miRNome	-0.0215613	756
bta.miR.10225b	whole milk miRNome	0.0215573	757
chi.miR.93.3p	fat globule miRNome	-0.0215487	758
bta.miR.6516	whole milk miRNome	0.0215118	759
bta.chr3_32653_mt	whole milk miRNome	0.0215077	760
bta.chr2_20227_mt	fat globule miRNome	0.0214883	761
dno.miR.29c.5p	fat globule miRNome	-0.0214258	762
bta.chr7_40750_mt	fat globule miRNome	0.0214242	763
bta.miR.2400	fat globule miRNome	0.0214026	764
bta.miR.10225a	whole milk miRNome	0.0213967	765
bta.miR.6536	fat globule miRNome	0.0213754	766
hsa.let.7f.2.3p	whole milk miRNome	0.0213625	767
bta.miR.885	whole milk miRNome	-0.0213072	768
bta.miR.2285cy	fat globule miRNome	0.0213042	769
bta.miR.361	whole milk miRNome	0.021303	770
hsa.miR.20a.3p	whole milk miRNome	0.0212957	771
hsa.miR.33a.3p	fat globule miRNome	0.021276	772
bta.miR.140	whole milk miRNome	0.0212557	773
bta.chr29_29999_mt	whole milk miRNome	-0.0212545	774
IGLL1 protein	skim milk proteome	0.0212464	775
bta.miR.6524	whole milk miRNome	-0.0212197	776
bta.chr16_12472_mt	fat globule miRNome	-0.0212065	777
bta.miR.2285cm	fat globule miRNome	0.0211916	778
bta.chr3_32217_mt	whole milk miRNome	0.021185	779
bta.chr7_39656_mt	fat globule miRNome	-0.0211739	780
Uncharacterized protein	skim milk proteome	0.0211651	781
bta.chr14_9694_mt	whole milk miRNome	0.0211526	782
bta.miR.23a	whole milk miRNome	0.0211485	783
bta.chr20_21167_mt	whole milk miRNome	-0.0211013	784
bta.miR.6517	fat globule miRNome	-0.0210915	785
bta.miR.2285k	fat globule miRNome	0.0210569	786
bta.chr2_19973_mt	whole milk miRNome	-0.0209903	787
bta.miR.12044	fat globule miRNome	0.0209594	788
mmu.miR.30e.3p	fat globule miRNome	-0.0208738	789
bta.miR.33b	fat globule miRNome	-0.0208721	790
Prostaglandin-H2 D-isomerase	skim milk proteome	0.0208611	791
Histone H2A.Z	skim milk proteome	0.0208513	792
hsa.miR.33a.3p	whole milk miRNome	0.0208375	793
PP1201 protein	skim milk proteome	0.0208105	794
bta.miR.6715	fat globule miRNome	-0.0207967	795
bta.miR.2285ao	whole milk miRNome	0.0207834	796
Alpha-S1-casein	skim milk proteome	0.0207543	797
bta.miR.2284m	whole milk miRNome	0.0207453	798
bta.miR.147	fat globule miRNome	0.0207224	799
bta.miR.2284g	whole milk miRNome	0.020709	800
bta.chr11_4782_mt	fat globule miRNome	-0.0206932	801
bta.miR.2285ci	fat globule miRNome	0.0206817	802
bta.miR.2284a	whole milk miRNome	0.0206808	803
bta.chr9_44097_mt	whole milk miRNome	-0.0206446	804
bta.let.7b	fat globule miRNome	-0.0206365	805
bta.chr6_38205_mt	fat globule miRNome	0.0206336	806
bta.miR.151.5p	fat globule miRNome	-0.0206327	807
hsa.miR.152.5p	whole milk miRNome	0.0206219	808
bta.chr19_16184_st	fat globule miRNome	0.0206177	809
bta.chr11_4230_st	whole milk miRNome	0.0206158	810
bta.miR.1277	fat globule miRNome	-0.0205954	811
bta.chr3_33134_mt	fat globule miRNome	0.0205907	812
bta.chr4_34131_mt	whole milk miRNome	-0.0205457	813
bta.chr25_25914_mt	whole milk miRNome	0.0205383	814
bta.chr21_22422_mt	fat globule miRNome	0.0205277	815
bta.chr5_37197_mt	fat globule miRNome	0.0205112	816
bta.miR.1307	fat globule miRNome	-0.020508	817
bta.chr19_17520_mt	fat globule miRNome	-0.0205069	818
bta.miR.19a	fat globule miRNome	0.020473	819
bta.chr10_2969_mt	whole milk miRNome	0.0204664	820
bta.chr25_27306_mt	whole milk miRNome	-0.0203749	821
bta.miR.2285f	whole milk miRNome	0.0203531	822
bta.chr13_7962_mt	fat globule miRNome	0.0203484	823
Keratin, type II cytoskeletal 7	skim milk proteome	0.0203306	824
bta.miR.2446	fat globule miRNome	-0.0203223	825
bta.chr29_30647_mt	whole milk miRNome	-0.0203092	826
bta.miR.194b	fat globule miRNome	-0.0202804	827
bta.chr13_7350_mt	whole milk miRNome	0.0202722	828
bta.miR.143	fat globule miRNome	-0.0202659	829
bta.chr12_6379_mt	whole milk miRNome	0.0202617	830
bta.chr10_3568_mt	fat globule miRNome	-0.0202575	831
bta.chr8_41806_mt	whole milk miRNome	-0.0202545	832
bta.chr25_26797_mt	fat globule miRNome	0.0202432	833
bta.miR.2299.5p	fat globule miRNome	0.0202338	834
mmu.miR.223.5p	fat globule miRNome	0.0202287	835
efu.miR.181a	fat globule miRNome	0.0202224	836
Ras-related protein Rab-18	skim milk proteome	0.0201872	837
bta.miR.500	whole milk miRNome	0.0201733	838
bta.miR.320b	whole milk miRNome	0.0201666	839
bta.miR.11982	fat globule miRNome	0.0201542	840
Acyl-CoA synthetase long chain family member 1	skim milk proteome	0.020141	841
bta.let.7e	fat globule miRNome	-0.0200986	842
bta.miR.194	whole milk miRNome	0.020087	843
bta.chr10_3421_mt	whole milk miRNome	-0.0200761	844
hsa.miR.196a.3p	fat globule miRNome	0.0200751	845
Cysteine-rich secretory protein 2	skim milk proteome	0.0200729	846
bta.miR.1248	whole milk miRNome	0.0200635	847
Uncharacterized protein	skim milk proteome	0.0200252	848
bta.miR.151.3p	whole milk miRNome	-0.0199769	849
bta.miR.2285cf	whole milk miRNome	0.019974	850
bta.chr7_40156_mt	whole milk miRNome	-0.0199666	851
bta.chr22_22911_mt	whole milk miRNome	-0.0199631	852
bta.miR.181c	whole milk miRNome	0.0199581	853
Heat shock cognate 71 kDa protein	skim milk proteome	0.0199518	854
bta.chr19_17520_mt	whole milk miRNome	0.0199386	855
bta.miR.877	fat globule miRNome	0.0199373	856
bta.chr17_13383_mt	fat globule miRNome	0.0199138	857
Lactadherin	skim milk proteome	-0.0198554	858
bta.chr3_32858_mt	fat globule miRNome	0.0198471	859
bta.miR.184	fat globule miRNome	0.0198329	860
bta.miR.2285bt	fat globule miRNome	-0.0198144	861
bta.miR.6536	whole milk miRNome	0.0197911	862
bta.chr13_7582_mt	whole milk miRNome	0.0197875	863
bta.chr8_41777_mt	whole milk miRNome	-0.0197787	864
bta.miR.2285bf	fat globule miRNome	-0.0197384	865
rno.miR.330.5p	whole milk miRNome	0.0197342	866
bta.miR.2285bh	whole milk miRNome	0.0197143	867
bta.miR.421	fat globule miRNome	-0.0196964	868
bta.miR.193a.3p	fat globule miRNome	0.0196875	869
bta.chr5_36523_mt	fat globule miRNome	0.0196805	870
bta.chr7_39377_mt	fat globule miRNome	0.0196784	871
bta.miR.1246	fat globule miRNome	0.0196665	872
bta.chr6_38114_mt	fat globule miRNome	-0.0196512	873
Ras-related C3 botulinum toxin substrate 1	skim milk proteome	0.019647	874
bta.chr21_21918_st	fat globule miRNome	0.0196374	875
bta.miR.2376	fat globule miRNome	0.0196237	876
bta.miR.190b	whole milk miRNome	0.0195904	877
bta.miR.376a	fat globule miRNome	-0.0195686	878
bta.miR.376b	fat globule miRNome	-0.0195686	879
bta.chr8_42738_mt	whole milk miRNome	-0.0195489	880
bta.chr26_28174_mt	fat globule miRNome	-0.0195314	881
bta.chr8_42337_st	whole milk miRNome	0.019472	882
bta.miR.2284f	whole milk miRNome	0.0194622	883
bta.chr20_20621_mt	whole milk miRNome	-0.0194518	884
bta.miR.2285bf	whole milk miRNome	0.019446	885
rno.miR.340.5p	fat globule miRNome	-0.0194165	886
Nucleotide exchange factor SIL1	skim milk proteome	0.0193979	887
mmu.miR.409.3p	whole milk miRNome	-0.0193745	888
bta.chr19_18139_mt	fat globule miRNome	0.0193719	889
NAGase	other	0.0193608	890
bta.chr5_36477_mt	fat globule miRNome	0.019356	891
bta.miR.2285be	fat globule miRNome	-0.0193234	892
bta.miR.15a	whole milk miRNome	0.0193232	893
bta.chr22_23272_mt	fat globule miRNome	0.0193173	894
bta.miR.2285dk	fat globule miRNome	0.0192875	895
bta.chr20_20709_mt	whole milk miRNome	-0.0192836	896
bta.miR.11988	whole milk miRNome	0.0192751	897
Lymphocyte antigen 96	skim milk proteome	0.0192472	898
bta.miR.148a	fat globule miRNome	-0.0192428	899
bta.miR.1246	whole milk miRNome	0.0192379	900
bta.chr12_6401_mt	whole milk miRNome	0.0192195	901
hsa.miR.3613.3p	whole milk miRNome	0.0192093	902
bta.chr14_9626_mt	fat globule miRNome	-0.0192026	903
bta.miR.199a.3p	fat globule miRNome	0.0192024	904
bta.miR.2284ab	whole milk miRNome	0.0191582	905
bta.miR.4286	fat globule miRNome	0.0191322	906
bta.miR.186	fat globule miRNome	-0.0191237	907
bta.miR.2285bm	fat globule miRNome	0.0191075	908
hsa.miR.335.3p	fat globule miRNome	-0.0190889	909
bta.miR.450a	whole milk miRNome	0.0190692	910
bta.chr24_25155_mt	whole milk miRNome	0.0190647	911
bta.miR.2285am.5p	fat globule miRNome	0.0190512	912
bta.chr7_40327_mt	whole milk miRNome	0.0190326	913
bta.miR.2285n	fat globule miRNome	-0.0190286	914
bta.chr24_25183_mt	whole milk miRNome	0.0190045	915
mml.miR.106a.3p	whole milk miRNome	0.019003	916
bta.chr1_462_mt	fat globule miRNome	0.0189803	917
bta.chr7_39493_mt	whole milk miRNome	-0.0189376	918
bta.miR.2285bn	whole milk miRNome	0.01893	919
bta.chr12_6980_mt	whole milk miRNome	-0.0189235	920
bta.chr22_23025_mt	fat globule miRNome	-0.0189194	921
Uncharacterized protein	skim milk proteome	0.0189032	922
bta.miR.2285bx	fat globule miRNome	-0.0188353	923
bta.chr16_11484_mt	whole milk miRNome	-0.0188351	924
bta.miR.2285dc	fat globule miRNome	0.0188097	925
mmu.miR.744.3p	whole milk miRNome	0.0187926	926
bta.miR.2411.5p	fat globule miRNome	0.018791	927
bta.miR.326	whole milk miRNome	0.0187373	928
bta.chr25_25934_st	whole milk miRNome	0.0187272	929
Rho-related GTP-binding protein RhoC	skim milk proteome	0.0187077	930
hsa.miR.375.5p	whole milk miRNome	-0.018679	931
bta.chr18_15496_mt	whole milk miRNome	0.0186659	932
bta.miR.2285cs	whole milk miRNome	0.0186445	933
bta.chr10_2670_st	whole milk miRNome	0.0186403	934
hsa.miR.29a.5p	whole milk miRNome	0.0186288	935
bta.chr22_23020_mt	fat globule miRNome	0.0186227	936
bta.miR.12030	fat globule miRNome	0.0186162	937
bta.chr4_34076_mt	whole milk miRNome	-0.0185873	938
bta.miR.2284b	fat globule miRNome	0.0185733	939
Annexin A5	skim milk proteome	0.0185694	940
bta.miR.455.3p	fat globule miRNome	0.0185497	941
bta.miR.429	whole milk miRNome	-0.0185115	942
bta.chr12_6407_mt	fat globule miRNome	0.0185033	943
bta.chr25_26350_st	whole milk miRNome	-0.0184676	944
bta.miR.378	whole milk miRNome	0.0184532	945
bta.chr21_21423_mt	whole milk miRNome	0.0184428	946
bta.miR.1291	fat globule miRNome	0.0184395	947
bta.chrX_45493_mt	fat globule miRNome	0.0184378	948
bta.chrX_45718_mt	fat globule miRNome	-0.0184326	949
bta.chr17_13185_mt	whole milk miRNome	0.0184119	950
bta.chr17_13059_st	fat globule miRNome	0.0184046	951
bta.miR.11989	fat globule miRNome	0.0183969	952
Keratin, type I cytoskeletal 14	skim milk proteome	-0.0183928	953
bta.miR.664b	fat globule miRNome	-0.0183928	954
bta.miR.12006	fat globule miRNome	-0.0183894	955
bta.miR.2435	fat globule miRNome	-0.0183685	956
bta.chr18_15321_mt	whole milk miRNome	0.0183666	957
bta.miR.2285as	whole milk miRNome	0.0183655	958
bta.miR.493	fat globule miRNome	-0.0183561	959
bta.chr2_20249_mt	whole milk miRNome	0.0183529	960
hsa.miR.320a.5p	fat globule miRNome	-0.0183233	961
bta.chr21_22426_mt	fat globule miRNome	0.0183141	962
bta.chr5_36436_mt	whole milk miRNome	-0.0183089	963
bta.chr7_39132_mt	fat globule miRNome	-0.0182889	964
bta.miR.2484	fat globule miRNome	0.0182705	965
bta.chr29_30651_mt	fat globule miRNome	0.0182629	966
bta.miR.10170.5p	fat globule miRNome	-0.0182426	967
bta.chr26_28125_mt	fat globule miRNome	0.0182325	968
bta.miR.2285ak.5p	whole milk miRNome	0.0182234	969
bta.miR.30b.5p	whole milk miRNome	-0.0181809	970
bta.chr17_13781_mt	fat globule miRNome	0.0181753	971
bta.miR.200c	fat globule miRNome	-0.0181458	972
bta.miR.2316	whole milk miRNome	0.0181279	973
bta.miR.423.5p	whole milk miRNome	-0.0180794	974
bta.chr22_22881_mt	fat globule miRNome	-0.0180326	975
bta.chr10_2620_mt	whole milk miRNome	0.0179969	976
bta.miR.183	fat globule miRNome	-0.0179724	977
bta.miR.34c	fat globule miRNome	0.017922	978
Vesicle amine transport 1	skim milk proteome	0.0179145	979
hsa.miR.181c.3p	whole milk miRNome	0.0178699	980
bta.chr9_43668_mt	fat globule miRNome	-0.0177599	981
bta.chr2_19057_mt	fat globule miRNome	-0.01773	982
bta.miR.2299.3p	whole milk miRNome	0.0177258	983
bta.chr16_11958_mt	whole milk miRNome	-0.0177159	984
bta.miR.2285as	fat globule miRNome	0.0177076	985
hsa.miR.378a.5p	whole milk miRNome	0.0176907	986
bta.chr10_3380_mt	whole milk miRNome	-0.0176817	987
bta.miR.2284j	whole milk miRNome	0.0176758	988
bta.chr11_5627_mt	whole milk miRNome	0.0176643	989
bta.miR.2285dg	fat globule miRNome	-0.0176599	990
bta.chr3_33216_mt	fat globule miRNome	0.0176571	991
bta.chr13_7582_mt	fat globule miRNome	0.0176373	992
bta.miR.23b.3p	whole milk miRNome	0.0176336	993
bta.chr19_18201_mt	fat globule miRNome	0.0176267	994
bta.miR.324	fat globule miRNome	0.0176153	995
HHIP like 2	skim milk proteome	0.0175871	996
bta.let.7c	fat globule miRNome	-0.0175856	997
bta.chr5_37295_mt	whole milk miRNome	-0.0175804	998
Major allergen beta-lactoglobulin	skim milk proteome	-0.0175672	999
ocu.miR.141.5p	whole milk miRNome	0.0175647	1000
bta.chr17_13473_mt	whole milk miRNome	-0.0175636	1001
bta.miR.2387	whole milk miRNome	-0.0175602	1002
Tetranectin	skim milk proteome	0.0175602	1003
bta.miR.2285ar	fat globule miRNome	0.0175128	1004
bta.chr19_16945_mt	fat globule miRNome	-0.0175065	1005
bta.chr9_43437_mt	whole milk miRNome	0.0174656	1006
xla.miR.140.5p	fat globule miRNome	0.0174604	1007
Enterotoxin-binding glycoprotein PP20K (Fragment)	skim milk proteome	-0.0174544	1008
bta.chrX_46049_mt	whole milk miRNome	-0.0174499	1009
bta.chr27_28658_mt	fat globule miRNome	0.0174285	1010
bta.chr19_17749_mt	whole milk miRNome	0.0174195	1011
bta.miR.2285u	whole milk miRNome	0.0173614	1012
bta.chr19_17323_mt	fat globule miRNome	-0.0173597	1013
hsa.miR.192.3p	fat globule miRNome	0.0173578	1014
bta.let.7a.3p	whole milk miRNome	0.017341	1015
bta.chr18_15505_mt	whole milk miRNome	0.0173268	1016
bta.chr2_19803_mt	whole milk miRNome	-0.0173142	1017
bta.chr7_40856_mt	fat globule miRNome	0.0173061	1018
bta.chr2_19403_mt	fat globule miRNome	0.0173048	1019
mmu.miR.146b.3p	fat globule miRNome	0.0173006	1020
bta.let.7f	fat globule miRNome	-0.0172672	1021
bta.chr14_9283_mt	whole milk miRNome	-0.0172661	1022
bta.miR.423.3p	fat globule miRNome	0.0172602	1023
bta.chr22_23087_mt	fat globule miRNome	0.017255	1024
bta.chr9_43684_mt	fat globule miRNome	0.0172427	1025
bta.let.7a.5p	fat globule miRNome	-0.01723	1026
Zinc-alpha-2-glycoprotein	skim milk proteome	0.0172249	1027
bta.miR.2285cc	whole milk miRNome	0.0172137	1028
bta.chr13_7872_mt	whole milk miRNome	0.0172127	1029
bta.miR.2461.3p	fat globule miRNome	-0.0172127	1030
bta.chr17_13423_mt	fat globule miRNome	0.0172126	1031
bta.miR.628	whole milk miRNome	0.0172	1032
bta.chr5_35429_mt	whole milk miRNome	0.0171774	1033
bta.chr29_30983_mt	fat globule miRNome	0.0171455	1034
bta.miR.665	fat globule miRNome	-0.0171436	1035
bta.chr2_18354_mt	fat globule miRNome	0.0171418	1036
bta.chr16_11799_mt	whole milk miRNome	0.0171157	1037
bta.chr9_43437_mt	fat globule miRNome	0.017089	1038
bta.miR.27a.5p	whole milk miRNome	0.0170837	1039
bta.chr29_30985_mt	whole milk miRNome	0.0170832	1040
bta.chr10_2797_mt	whole milk miRNome	0.0170791	1041
bta.miR.194b.3p	fat globule miRNome	-0.0170402	1042
bta.miR.188	fat globule miRNome	0.0170397	1043
bta.miR.21.5p	whole milk miRNome	0.0170285	1044
bta.chr23_23613_mt	fat globule miRNome	-0.0170131	1045
hsa.miR.186.3p	fat globule miRNome	0.0169927	1046
bta.chr3_33304_mt	whole milk miRNome	-0.0169592	1047
bta.miR.146a	fat globule miRNome	0.0169372	1048
hsa.miR.135a.2.3p	whole milk miRNome	-0.0169272	1049
bta.miR.2285aw	whole milk miRNome	0.0169101	1050
Sodium-dependent phosphate transport protein 2B	skim milk proteome	-0.0168968	1051
bta.miR.378b	whole milk miRNome	0.0168956	1052
Guanine nucleotide-binding protein G(I)/G(S)/G(T) subunit beta-2	skim milk proteome	0.0168924	1053
bta.miR.339b	fat globule miRNome	0.0168886	1054
bta.chr4_33810_st	fat globule miRNome	0.0168804	1055
bta.miR.2484	whole milk miRNome	0.0168781	1056
bta.miR.2285ap	fat globule miRNome	0.0168649	1057
bta.miR.10167.3p	fat globule miRNome	0.0168607	1058
bta.miR.11972	fat globule miRNome	0.0168588	1059
hsa.miR.378e	whole milk miRNome	0.0168512	1060
bta.miR.2353	whole milk miRNome	0.0168454	1061
bta.miR.339b	whole milk miRNome	-0.0168298	1062
bta.chr14_9504_mt	fat globule miRNome	0.0167975	1063
bta.chr13_7892_st	fat globule miRNome	-0.0167657	1064
bta.chr3_32025_mt	whole milk miRNome	-0.0167586	1065
bta.chr25_25937_mt	fat globule miRNome	-0.0167564	1066
bta.miR.760.5p	fat globule miRNome	0.0167286	1067
bta.miR.2285bt	whole milk miRNome	0.0167123	1068
bta.chr1_462_mt	whole milk miRNome	0.0167049	1069
bta.chr1_1099_mt	fat globule miRNome	0.0166996	1070
mmu.miR.221.5p	fat globule miRNome	0.0166882	1071
bta.miR.3431	fat globule miRNome	-0.01666	1072
bta.miR.2440	fat globule miRNome	0.01664	1073
bta.miR.6518	fat globule miRNome	0.0166304	1074
bta.miR.484	whole milk miRNome	-0.0166026	1075
bta.miR.2457	fat globule miRNome	0.0165662	1076
bta.miR.490	fat globule miRNome	0.0165653	1077
bta.chr17_13059_mt	whole milk miRNome	0.0165394	1078
mmu.miR.145a.3p	fat globule miRNome	-0.0165379	1079
bta.chr5_36191_mt	fat globule miRNome	-0.0165339	1080
bta.chr27_28475_st	fat globule miRNome	-0.0165191	1081
bta.chr28_29206_mt	fat globule miRNome	0.0164928	1082
bta.miR.142.5p	fat globule miRNome	0.0164893	1083
bta.chr29_30651_mt	whole milk miRNome	0.0164774	1084
bta.miR.219.5p	fat globule miRNome	0.0164677	1085
bta.chr17_14031_mt	whole milk miRNome	-0.0164488	1086
bta.miR.1388.5p	whole milk miRNome	-0.0164289	1087
Polyubiquitin-B	skim milk proteome	0.016426	1088
bta.chr21_22023_mt	fat globule miRNome	0.0164131	1089
bta.miR.2285di	fat globule miRNome	-0.0164115	1090
bta.chr5_36184_mt	whole milk miRNome	-0.0164061	1091
bta.miR.6715	whole milk miRNome	-0.0163956	1092
bta.miR.3064	fat globule miRNome	-0.016383	1093
Uncharacterized protein	skim milk proteome	0.016328	1094
bta.chr4_35039_mt	fat globule miRNome	-0.0163244	1095
bta.chr25_26748_mt	whole milk miRNome	0.0163097	1096
bta.miR.345.5p	whole milk miRNome	0.0162703	1097
bta.miR.2285ar	whole milk miRNome	0.0162699	1098
bta.chr11_4310_mt	whole milk miRNome	-0.0162619	1099
bta.miR.2285u	fat globule miRNome	0.0162351	1100
bta.chr11_5878_mt	whole milk miRNome	0.0162198	1101
hsa.miR.219a.5p	fat globule miRNome	0.0161777	1102
bta.miR.20b	whole milk miRNome	0.0161588	1103
bta.miR.2284l	whole milk miRNome	0.0161336	1104
bta.chr13_7892_st	whole milk miRNome	0.0161118	1105
mmu.miR.542.3p	fat globule miRNome	0.0160992	1106
bta.chr15_10644_mt	whole milk miRNome	-0.0160969	1107
bta.chr4_34963_mt	whole milk miRNome	0.0160923	1108
mml.miR.106a.3p	fat globule miRNome	-0.0160576	1109
bta.miR.11977	whole milk miRNome	0.01602	1110
bta.miR.212	fat globule miRNome	0.0160087	1111
bta.chr13_7988_mt	fat globule miRNome	0.0160079	1112
aca.miR.26.3p	fat globule miRNome	0.0159841	1113
bta.chr26_28174_mt	whole milk miRNome	-0.0159685	1114
bta.chr1_90_mt	fat globule miRNome	0.0159645	1115
bta.chr1_537_mt	whole milk miRNome	-0.0159416	1116
hsa.miR.212.3p	fat globule miRNome	0.0159055	1117
bta.miR.92b	fat globule miRNome	-0.0158903	1118
bta.miR.374a	fat globule miRNome	-0.0158294	1119
bta.miR.380.3p	fat globule miRNome	-0.0157968	1120
bta.chr5_37197_mt	whole milk miRNome	0.0157877	1121
bta.chrX_45493_mt	whole milk miRNome	0.0157875	1122
bta.miR.2284h.5p	whole milk miRNome	0.015781	1123
bta.chr26_28125_mt	whole milk miRNome	0.0157432	1124
bta.miR.146b	fat globule miRNome	0.015732	1125
bta.chr15_10417_mt	whole milk miRNome	0.0157045	1126
bta.miR.2285bw	whole milk miRNome	0.0157029	1127
bta.chr19_16945_mt	whole milk miRNome	0.0156889	1128
bta.miR.17.5p	whole milk miRNome	0.0156782	1129
bta.miR.2284p	whole milk miRNome	0.0156641	1130
Guanine nucleotide-binding protein G(I)/G(S)/G(T) subunit beta-1	skim milk proteome	0.0156614	1131
bta.miR.455.5p	fat globule miRNome	0.0156566	1132
RAB2A, member RAS oncogene family	skim milk proteome	-0.0156525	1133
bta.chr19_18201_mt	whole milk miRNome	0.0156149	1134
bta.chr5_35642_mt	fat globule miRNome	0.0156133	1135
bta.miR.10225a	fat globule miRNome	0.0156042	1136
bta.chr21_21787_mt	fat globule miRNome	0.0155826	1137
bta.miR.2285an	fat globule miRNome	-0.0155783	1138
hsa.let.7e.3p	whole milk miRNome	-0.0155353	1139
bta.chrX_44662_mt	fat globule miRNome	-0.0155058	1140
bta.miR.10225b	fat globule miRNome	0.0154876	1141
bta.miR.2468	whole milk miRNome	0.0154834	1142
Monocyte differentiation antigen CD14	skim milk proteome	0.0154497	1143
Alpha-S2-casein	skim milk proteome	-0.0154396	1144
mmu.miR.181a.2.3p	fat globule miRNome	-0.0154377	1145
bta.chr12_6014_mt	whole milk miRNome	0.0154324	1146
bta.chr12_6407_mt	whole milk miRNome	0.0154131	1147
bta.miR.11978	whole milk miRNome	-0.0154008	1148
bta.chr19_18008_mt	whole milk miRNome	0.0153961	1149
mmu.miR.125a.3p	fat globule miRNome	-0.0153879	1150
bta.miR.127	whole milk miRNome	-0.0153568	1151
bta.miR.132	fat globule miRNome	0.0153534	1152
bta.miR.2310	fat globule miRNome	0.0153527	1153
bta.chr10_3568_mt	whole milk miRNome	0.0153225	1154
bta.chr4_33613_mt	fat globule miRNome	0.0153201	1155
bta.chr21_22426_mt	whole milk miRNome	0.0152956	1156
gga.miR.18b.3p	whole milk miRNome	-0.0152083	1157
bta.miR.2285c	fat globule miRNome	0.015205	1158
bta.chr20_21041_mt	whole milk miRNome	0.0151981	1159
hsa.miR.628.3p	fat globule miRNome	-0.0151968	1160
bta.chr3_31250_mt	fat globule miRNome	0.0151961	1161
bta.miR.1814c	fat globule miRNome	0.0151805	1162
bta.miR.374a	whole milk miRNome	0.0151798	1163
bta.miR.101	fat globule miRNome	-0.0151496	1164
bta.miR.2285co	fat globule miRNome	0.0151463	1165
bta.miR.11992	whole milk miRNome	0.0151246	1166
bta.chr7_40546_mt	whole milk miRNome	-0.0150992	1167
bta.miR.10182.5p	fat globule miRNome	0.0150763	1168
bta.miR.2888	fat globule miRNome	0.0150469	1169
hsa.miR.92a.1.5p	fat globule miRNome	0.0150428	1170
bta.chr5_37295_mt	fat globule miRNome	-0.0150371	1171
bta.miR.1468	fat globule miRNome	-0.0150184	1172
bta.miR.1842	whole milk miRNome	0.0150045	1173
bta.chr12_6533_mt	whole milk miRNome	-0.014988	1174
bta.chr8_42219_mt	fat globule miRNome	-0.0149809	1175
bta.chr10_3635_mt	whole milk miRNome	-0.0149794	1176
bta.chr19_17520_st	fat globule miRNome	-0.0149626	1177
bta.miR.369.3p	whole milk miRNome	0.0149513	1178
bta.miR.2410	fat globule miRNome	-0.0149389	1179
bta.miR.222	whole milk miRNome	0.0149316	1180
bta.miR.1249	fat globule miRNome	0.01489	1181
bta.miR.139	fat globule miRNome	0.0148765	1182
bta.chr6_38867_st	whole milk miRNome	0.0148661	1183
bta.miR.25	fat globule miRNome	0.014866	1184
bta.chr11_5371_mt	fat globule miRNome	-0.0148575	1185
bta.miR.2411.5p	whole milk miRNome	-0.0148567	1186
bta.miR.6522	fat globule miRNome	-0.0148522	1187
bta.miR.2285cx	whole milk miRNome	0.014834	1188
bta.miR.2285dg	whole milk miRNome	0.0148321	1189
bta.miR.2284r	fat globule miRNome	0.0147926	1190
bta.miR.2285c	whole milk miRNome	0.0147845	1191
bta.miR.2285g	whole milk miRNome	0.0147685	1192
bta.chr7_39461_mt	whole milk miRNome	-0.0147642	1193
bta.chr10_3421_mt	fat globule miRNome	0.014761	1194
bta.miR.11980	fat globule miRNome	-0.0147427	1195
bta.miR.224	whole milk miRNome	0.0147285	1196
bta.chr19_16673_mt	whole milk miRNome	0.01471	1197
bta.miR.2313.3p	whole milk miRNome	0.0146634	1198
bta.miR.2285by	fat globule miRNome	0.0146551	1199
hsa.miR.26b.3p	whole milk miRNome	0.0146516	1200
chi.miR.342.5p	whole milk miRNome	0.0146416	1201
bta.miR.6523a	whole milk miRNome	0.014607	1202
bta.chr5_35357_mt	whole milk miRNome	0.0145869	1203
bta.chr19_17765_mt	fat globule miRNome	0.014524	1204
bta.chr29_29984_mt	fat globule miRNome	0.0145218	1205
bta.chr22_23077_mt	whole milk miRNome	-0.014519	1206
Beta-casein	skim milk proteome	-0.0145177	1207
bta.chr24_25376_st	fat globule miRNome	-0.0145149	1208
bta.chr22_23408_mt	whole milk miRNome	0.0145062	1209
bta.miR.2285cm	whole milk miRNome	0.0144919	1210
bta.chr13_8213_mt	fat globule miRNome	-0.0144888	1211
bta.chr19_18100_mt	whole milk miRNome	-0.0144828	1212
bta.chr14_9464_mt	fat globule miRNome	-0.0144741	1213
bta.miR.2325a	fat globule miRNome	0.0144695	1214
bta.miR.2285i	whole milk miRNome	0.0144688	1215
bta.chrX_45431_mt	whole milk miRNome	0.0144671	1216
bta.chr14_9648_mt	fat globule miRNome	-0.0144155	1217
bta.chr29_30647_mt	fat globule miRNome	-0.014407	1218
bta.miR.374c	fat globule miRNome	-0.0143956	1219
bta.chr5_36191_mt	whole milk miRNome	0.0143929	1220
bta.chrX_45971_mt	fat globule miRNome	-0.0143839	1221
bta.miR.582	fat globule miRNome	0.0143522	1222
bta.chr25_26957_mt	fat globule miRNome	-0.0143351	1223
ssc.miR.374b.3p	fat globule miRNome	-0.0142993	1224
bta.chr3_32858_mt	whole milk miRNome	0.0142896	1225
bta.chr9_42963_st	whole milk miRNome	-0.0142873	1226
bta.chr5_37343_mt	whole milk miRNome	0.0142765	1227
bta.chr15_10379_mt	fat globule miRNome	0.0142748	1228
chi.miR.93.3p	whole milk miRNome	0.0142696	1229
bta.miR.154c	fat globule miRNome	0.0142535	1230
bta.chr18_14960_mt	fat globule miRNome	0.0142511	1231
bta.miR.219	fat globule miRNome	-0.0142497	1232
bta.chr3_32077_mt	fat globule miRNome	0.0142343	1233
bta.chr20_21111_mt	fat globule miRNome	-0.0142267	1234
bta.chr29_29761_mt	whole milk miRNome	0.0141972	1235
bta.miR.454	fat globule miRNome	0.0141894	1236
bta.chr16_12441_mt	fat globule miRNome	0.0141745	1237
bta.miR.2285ba	whole milk miRNome	-0.0141721	1238
bta.miR.2285ca	whole milk miRNome	0.0141713	1239
Lipocalin 2	skim milk proteome	0.0141695	1240
Xanthine dehydrogenase/oxidase	skim milk proteome	0.0141663	1241
Chitinase domain-containing protein 1	skim milk proteome	0.0141636	1242
bta.miR.2285ac	fat globule miRNome	0.0141553	1243
qpcr_26b	other	0.0141423	1244
bta.chr19_16778_mt	whole milk miRNome	0.0141307	1245
bta.chr10_3060_mt	whole milk miRNome	0.0141235	1246
bta.chr9_42963_st	fat globule miRNome	-0.0141219	1247
bta.miR.2285cj	whole milk miRNome	0.0141138	1248
bta.miR.760.3p	fat globule miRNome	0.0141109	1249
bta.chr7_39207_mt	whole milk miRNome	-0.0140658	1250
bta.chr2_19803_mt	fat globule miRNome	0.0140597	1251
hsa.miR.125b.2.3p	fat globule miRNome	-0.0140431	1252
bta.chr18_15505_mt	fat globule miRNome	-0.0140034	1253
bta.chr4_34963_mt	fat globule miRNome	0.013998	1254
bta.chr20_20999_mt	whole milk miRNome	-0.013994	1255
bta.miR.2285dd	fat globule miRNome	0.0139939	1256
bta.miR.1839	fat globule miRNome	-0.0139764	1257
bta.chr4_34531_mt	whole milk miRNome	-0.0139464	1258
bta.miR.2285cj	fat globule miRNome	0.0139343	1259
mmu.miR.221.5p	whole milk miRNome	0.0139167	1260
bta.chr13_7872_mt	fat globule miRNome	0.0139122	1261
hsa.let.7f.1.3p	whole milk miRNome	0.0139119	1262
bta.miR.1842	fat globule miRNome	-0.013898	1263
bta.chr22_22541_mt	whole milk miRNome	0.0138944	1264
bta.chr19_16065_mt	fat globule miRNome	-0.013881	1265
bta.chr18_15852_mt	fat globule miRNome	0.013873	1266
bta.miR.223	fat globule miRNome	0.0138701	1267
bta.chr16_12513_mt	whole milk miRNome	-0.0138674	1268
bta.chr10_3488_mt	fat globule miRNome	-0.0138617	1269
bta.miR.2285bl	fat globule miRNome	0.0138599	1270
bta.chr1_1931_mt	whole milk miRNome	-0.0138453	1271
bta.miR.708	fat globule miRNome	0.0138439	1272
Cartilage acidic protein 1	skim milk proteome	0.0137844	1273
bta.miR.2285q	whole milk miRNome	0.0137763	1274
bta.chr18_15496_mt	fat globule miRNome	0.0137685	1275
bta.miR.2285ax	whole milk miRNome	-0.0137667	1276
bta.chr29_29984_mt	whole milk miRNome	0.0137607	1277
bta.miR.10166.5p	fat globule miRNome	-0.0137328	1278
bta.miR.2285ce	fat globule miRNome	0.0137295	1279
bta.chr4_33810_st	whole milk miRNome	0.0137167	1280
mmu.let.7g.3p	whole milk miRNome	0.013714	1281
mmu.miR.188.3p	whole milk miRNome	0.0137058	1282
bta.miR.136	whole milk miRNome	0.0137048	1283
bta.miR.2285ba	fat globule miRNome	-0.0136763	1284
bta.chr20_21016_mt	whole milk miRNome	-0.0136578	1285
bta.miR.6525	whole milk miRNome	0.0136562	1286
bta.miR.92b	whole milk miRNome	-0.0136538	1287
hsa.miR.34a.3p	fat globule miRNome	0.0136356	1288
bta.miR.486	whole milk miRNome	0.0136144	1289
bta.chr25_25839_mt	fat globule miRNome	-0.0135915	1290
bta.chrX_45971_mt	whole milk miRNome	0.0135773	1291
bta.miR.374c	whole milk miRNome	0.013574	1292
bta.chr20_21111_mt	whole milk miRNome	-0.0135719	1293
bta.miR.3432a	fat globule miRNome	0.0135623	1294
bta.chr18_14577_mt	fat globule miRNome	0.0135597	1295
bta.chr3_31800_st	fat globule miRNome	0.0135519	1296
bta.chr14_9634_mt	fat globule miRNome	0.0135152	1297
bta.chr19_17406_mt	fat globule miRNome	-0.0135116	1298
bta.miR.2285bi	whole milk miRNome	0.0134904	1299
bta.chr28_29687_mt	whole milk miRNome	0.0134903	1300
Ras-related protein Rab-7a	skim milk proteome	0.0134787	1301
bta.miR.411a	fat globule miRNome	-0.0134288	1302
5'-nucleotidase	skim milk proteome	0.0134222	1303
bta.miR.2313.5p	whole milk miRNome	0.013411	1304
bta.chr19_17103_mt	whole milk miRNome	-0.0134015	1305
bta.chr22_23272_mt	whole milk miRNome	-0.0133959	1306
bta.miR.136	fat globule miRNome	0.0133866	1307
hsa.miR.652.5p	fat globule miRNome	0.0133816	1308
bta.chr22_22911_mt	fat globule miRNome	0.0133795	1309
bta.chr3_32921_mt	whole milk miRNome	-0.0133649	1310
glucose-6P	other	-0.0133549	1311
bta.chr11_4727_mt	whole milk miRNome	-0.013354	1312
bta.chr14_9640_mt	fat globule miRNome	-0.0132871	1313
bta.chr12_6175_st	whole milk miRNome	0.0132763	1314
bta.chr25_25839_mt	whole milk miRNome	-0.0132759	1315
hsa.miR.200c.5p	whole milk miRNome	0.0132744	1316
bta.miR.381	fat globule miRNome	-0.0132742	1317
oha.miR.98.3p	whole milk miRNome	0.0132702	1318
bta.chr6_38114_mt	whole milk miRNome	-0.0132616	1319
bta.chr14_8558_mt	whole milk miRNome	-0.0132554	1320
bta.miR.671	whole milk miRNome	0.0132468	1321
Glucosidase II alpha subunit	skim milk proteome	0.0132432	1322
bta.miR.2424	fat globule miRNome	0.0132422	1323
bta.chr6_38201_mt	fat globule miRNome	0.0132171	1324
bta.chr7_40213_mt	fat globule miRNome	-0.0132157	1325
bta.miR.7857.3p	whole milk miRNome	-0.0132	1326
bta.chr17_14009_mt	whole milk miRNome	-0.013189	1327
bta.miR.363	whole milk miRNome	0.0131831	1328
bta.chr18_14289_mt	whole milk miRNome	0.0131821	1329
bta.chr28_29547_mt	fat globule miRNome	-0.013167	1330
bta.chr15_10558_mt	whole milk miRNome	0.0131654	1331
ami.miR.215.3p	whole milk miRNome	0.0131616	1332
bta.chr8_42495_mt	whole milk miRNome	0.0131374	1333
bta.miR.345.5p	fat globule miRNome	0.0130983	1334
bta.chr18_14577_mt	whole milk miRNome	0.013071	1335
bta.chr21_22422_mt	whole milk miRNome	-0.013069	1336
bta.miR.2285i	fat globule miRNome	0.013062	1337
bta.miR.340	fat globule miRNome	0.0130612	1338
hsa.miR.628.3p	whole milk miRNome	0.0130585	1339
mmu.miR.200b.5p	fat globule miRNome	-0.0130543	1340
bta.chr18_15252_mt	fat globule miRNome	0.0130403	1341
bta.chr18_14524_st	whole milk miRNome	0.0130197	1342
bta.miR.193a.5p	fat globule miRNome	0.0129977	1343
bta.chr17_13482_mt	fat globule miRNome	0.0129962	1344
bta.miR.1306	fat globule miRNome	0.012996	1345
bta.chr10_2746_mt	whole milk miRNome	0.0129923	1346
bta.chr13_7350_mt	fat globule miRNome	0.0129802	1347
bta.chr15_10050_mt	whole milk miRNome	0.0129574	1348
bta.chr22_23531_mt	fat globule miRNome	-0.0129563	1349
bta.chr17_13059_mt	fat globule miRNome	0.0129536	1350
C4b-binding protein alpha chain	skim milk proteome	0.0129533	1351
bta.miR.1343.3p	whole milk miRNome	0.0129475	1352
bta.chr19_16397_mt	whole milk miRNome	0.0129268	1353
bta.miR.10164.3p	fat globule miRNome	0.0129189	1354
bta.chr29_30025_mt	fat globule miRNome	-0.0129069	1355
bta.chr18_14271_mt	whole milk miRNome	-0.0129064	1356
bta.chr15_10637_mt	whole milk miRNome	0.0128899	1357
rno.miR.148b.5p	whole milk miRNome	0.0128549	1358
bta.chr26_28383_mt	fat globule miRNome	0.0128505	1359
bta.chr12_6384_mt	fat globule miRNome	0.0128482	1360
bta.chr15_10516_mt	fat globule miRNome	-0.0128194	1361
bta.miR.2461.3p	whole milk miRNome	-0.0128183	1362
bta.chr5_35429_mt	fat globule miRNome	0.0128147	1363
mmu.miR.99b.3p	fat globule miRNome	-0.0128135	1364
bta.chr3_32077_mt	whole milk miRNome	0.0128133	1365
bta.chr8_41647_mt	whole milk miRNome	0.0127917	1366
bta.miR.106a	whole milk miRNome	0.012786	1367
bta.chr25_26824_mt	whole milk miRNome	-0.0127763	1368
bta.chr18_15901_mt	whole milk miRNome	0.0127408	1369
bta.chr7_40213_mt	whole milk miRNome	0.0127346	1370
bta.miR.2285f	fat globule miRNome	0.0127285	1371
bta.chr15_10278_mt	whole milk miRNome	0.0127251	1372
bta.miR.2376	whole milk miRNome	0.0127156	1373
bta.chr17_13473_mt	fat globule miRNome	-0.0126673	1374
bta.chr17_13968_mt	fat globule miRNome	-0.0126419	1375
bta.chr27_28673_mt	whole milk miRNome	0.0126369	1376
bta.miR.98	fat globule miRNome	-0.0126146	1377
bta.miR.197	whole milk miRNome	0.0126074	1378
bta.chr17_13383_mt	whole milk miRNome	0.0125534	1379
bta.miR.2285da	fat globule miRNome	0.0125337	1380
chi.miR.3431.3p	whole milk miRNome	-0.0125334	1381
bta.miR.374b	whole milk miRNome	0.0125151	1382
bta.miR.2285h	fat globule miRNome	0.0125081	1383
bta.miR.362.3p	whole milk miRNome	0.0124751	1384
bta.miR.1777a	fat globule miRNome	-0.0124723	1385
bta.chr11_4184_mt	fat globule miRNome	-0.0124681	1386
bta.chr19_17167_mt	whole milk miRNome	-0.0124623	1387
bta.miR.4286	whole milk miRNome	-0.012434	1388
bta.miR.11986	fat globule miRNome	-0.0124263	1389
bta.chr5_35460_mt	whole milk miRNome	-0.0124188	1390
bta.chrX_45078_mt	fat globule miRNome	0.0124101	1391
bta.chr29_31074_mt	fat globule miRNome	-0.0123945	1392
Alpha-lactalbumin	skim milk proteome	-0.0123865	1393
bta.miR.2285d	fat globule miRNome	0.0123775	1394
bta.chr10_2797_mt	fat globule miRNome	0.0123512	1395
bta.chr2_18911_mt	whole milk miRNome	0.0123363	1396
bta.miR.139	whole milk miRNome	0.0123332	1397
bta.chr25_25934_mt	fat globule miRNome	0.0123272	1398
bta.chr17_13327_mt	fat globule miRNome	-0.0122871	1399
Fatty acid-binding protein, heart	skim milk proteome	0.0122603	1400
bta.chr5_36355_mt	fat globule miRNome	0.0122529	1401
mmu.let.7i.3p	fat globule miRNome	0.0122072	1402
bta.miR.148b	fat globule miRNome	-0.0122031	1403
bta.miR.2339	whole milk miRNome	-0.0121986	1404
bta.chr29_30941_mt	fat globule miRNome	-0.0121945	1405
bta.miR.339a	whole milk miRNome	-0.0121876	1406
bta.chr21_21906_mt	fat globule miRNome	-0.0121791	1407
bta.chr26_28383_mt	whole milk miRNome	0.0121758	1408
mml.miR.452.3p	whole milk miRNome	0.012171	1409
chi.miR.3431.3p	fat globule miRNome	-0.0121468	1410
bta.chr7_39037_mt	fat globule miRNome	0.0121235	1411
bta.chr8_42337_mt	fat globule miRNome	-0.0121028	1412
bta.chr19_17157_st	fat globule miRNome	0.0120954	1413
ssc.miR.374a.3p	fat globule miRNome	-0.0120816	1414
bta.chr18_14991_mt	whole milk miRNome	-0.012065	1415
bta.chr21_22320_mt	fat globule miRNome	-0.012014	1416
bta.chr2_18340_mt	whole milk miRNome	0.0119916	1417
bta.miR.2285dh	fat globule miRNome	0.0119721	1418
bta.chr4_34135_mt	fat globule miRNome	-0.0119457	1419
mmu.miR.136.3p	whole milk miRNome	0.0119237	1420
bta.miR.744	fat globule miRNome	0.0119214	1421
bta.miR.320a	whole milk miRNome	-0.0119203	1422
bta.miR.27a.5p	fat globule miRNome	0.0118984	1423
bta.miR.545.3p	fat globule miRNome	-0.0118799	1424
bta.chr28_29687_mt	fat globule miRNome	-0.0118648	1425
bta.chr7_39132_st	whole milk miRNome	0.0118607	1426
bta.chr14_9261_mt	whole milk miRNome	-0.0118586	1427
bta.miR.6520	whole milk miRNome	0.0118586	1428
bta.chr17_13703_mt	fat globule miRNome	-0.0118528	1429
bta.miR.500	fat globule miRNome	-0.0118507	1430
bta.chr8_41526_st	fat globule miRNome	-0.0118497	1431
bta.chr19_16184_mt	fat globule miRNome	0.0118444	1432
bta.miR.2431.3p	fat globule miRNome	0.0118064	1433
bta.miR.6775	fat globule miRNome	-0.0117848	1434
bta.chr8_42367_st	fat globule miRNome	0.0117826	1435
bta.chr26_28259_mt	fat globule miRNome	0.0117766	1436
bta.chr8_41852_mt	fat globule miRNome	0.0117747	1437
bta.miR.2483.5p	fat globule miRNome	0.0117631	1438
bta.miR.2285av	whole milk miRNome	0.0117322	1439
bta.miR.2285av	fat globule miRNome	0.0117315	1440
bta.let.7g	fat globule miRNome	-0.0117263	1441
hsa.miR.103a.1.5p	fat globule miRNome	0.0117034	1442
bta.chr5_36414_mt	fat globule miRNome	0.0117013	1443
bta.chr18_14119_mt	fat globule miRNome	-0.0116943	1444
bta.chr7_39949_mt	fat globule miRNome	-0.0116806	1445
bta.miR.30b.5p	fat globule miRNome	-0.0116306	1446
bta.miR.330	whole milk miRNome	0.011618	1447
bta.miR.338	fat globule miRNome	0.011617	1448
tgu.let.7b.3p	fat globule miRNome	-0.0115959	1449
bta.chr16_12196_mt	fat globule miRNome	-0.0115942	1450
bta.miR.410	fat globule miRNome	-0.0115874	1451
bta.chr10_3635_mt	fat globule miRNome	-0.0115299	1452
bta.chr12_6384_mt	whole milk miRNome	0.0115154	1453
bta.miR.12023	fat globule miRNome	-0.0115083	1454
bta.miR.2285bu	fat globule miRNome	0.011487	1455
bta.chr28_29278_mt	fat globule miRNome	-0.0114837	1456
bta.chr4_34135_st	fat globule miRNome	-0.0114698	1457
bta.chr2_18495_mt	fat globule miRNome	0.0114611	1458
bta.chr8_42619_st	fat globule miRNome	-0.0114422	1459
bta.miR.1296	fat globule miRNome	0.0114402	1460
bta.chr25_25820_mt	fat globule miRNome	-0.0114031	1461
bta.miR.29a	whole milk miRNome	-0.0114025	1462
bta.chr25_26033_mt	whole milk miRNome	-0.0113665	1463
bta.chrUn_GJ057397v1_44378_mt	whole milk miRNome	-0.0113471	1464
bta.chr16_11937_mt	fat globule miRNome	-0.0113326	1465
hsa.miR.493.5p	whole milk miRNome	-0.0112717	1466
rno.miR.148b.5p	fat globule miRNome	0.0112711	1467
bta.miR.2285bc	whole milk miRNome	0.0112634	1468
hsa.miR.541.5p	fat globule miRNome	0.0112434	1469
bta.chr3_32429_mt	whole milk miRNome	0.0112366	1470
bta.chr2_18678_mt	fat globule miRNome	0.0112287	1471
bta.chr8_42865_mt	whole milk miRNome	0.0112271	1472
bta.chr2_20275_mt	fat globule miRNome	0.0112205	1473
bta.chr26_27805_mt	fat globule miRNome	0.0112049	1474
bta.miR.126.3p	whole milk miRNome	0.011192	1475
bta.chr1_1656_mt	fat globule miRNome	0.0111886	1476
bta.miR.11994	fat globule miRNome	0.0111828	1477
bta.miR.10166.5p	whole milk miRNome	-0.0111711	1478
hsa.miR.7.1.3p	whole milk miRNome	0.0111322	1479
bta.miR.12012	fat globule miRNome	-0.0111287	1480
bta.miR.2285bk	fat globule miRNome	0.0111183	1481
hsa.miR.671.3p	whole milk miRNome	-0.0111103	1482
bta.chr20_20593_mt	whole milk miRNome	-0.0110905	1483
bta.miR.1307	whole milk miRNome	0.0110764	1484
bta.miR.335	fat globule miRNome	-0.0110661	1485
Rho GDP-dissociation inhibitor 1	skim milk proteome	0.0110489	1486
bta.chr1_1228_mt	fat globule miRNome	0.0110336	1487
Cystatin-C	skim milk proteome	0.0110313	1488
bta.chr18_14676_mt	fat globule miRNome	0.0110139	1489
bta.chr3_31581_mt	fat globule miRNome	0.0110084	1490
bta.chr20_21178_mt	whole milk miRNome	0.0110065	1491
bta.chr18_15586_mt	fat globule miRNome	-0.0109908	1492
bta.miR.877	whole milk miRNome	-0.0109775	1493
bta.miR.2285dl.3p	fat globule miRNome	0.0109598	1494
bta.chr16_11937_mt	whole milk miRNome	-0.01095	1495
mmu.miR.542.3p	whole milk miRNome	0.0109108	1496
bta.miR.3432b	whole milk miRNome	0.0109062	1497
hsa.miR.197.5p	whole milk miRNome	0.0108991	1498
bta.chr21_22072_mt	fat globule miRNome	0.0108694	1499
bta.chrX_44708_st	whole milk miRNome	0.0108668	1500
bta.miR.29c	whole milk miRNome	-0.0108639	1501
bta.chr22_22845_mt	whole milk miRNome	0.0108566	1502
bta.miR.24.3p	fat globule miRNome	0.0107918	1503
bta.chr1_451_mt	fat globule miRNome	0.0107704	1504
bta.miR.7857.5p	whole milk miRNome	-0.0107595	1505
bta.miR.490	whole milk miRNome	0.0107586	1506
bta.miR.2285v	whole milk miRNome	0.0107536	1507
bta.chr10_2620_mt	fat globule miRNome	0.010736	1508
bta.miR.11978	fat globule miRNome	-0.0107282	1509
bta.miR.181c	fat globule miRNome	-0.0107221	1510
bta.miR.191	fat globule miRNome	0.0107133	1511
bta.miR.11980	whole milk miRNome	-0.0106947	1512
mmu.miR.299a.3p	whole milk miRNome	-0.0106839	1513
bta.miR.11991	fat globule miRNome	0.0106812	1514
bta.chr13_8332_mt	fat globule miRNome	-0.0106809	1515
bta.chr11_4616_mt	fat globule miRNome	0.0106647	1516
bta.chr17_13216_mt	fat globule miRNome	0.0106612	1517
bta.chr20_20763_mt	whole milk miRNome	-0.0106603	1518
oan.miR.454.5p	whole milk miRNome	0.0106436	1519
bta.miR.106b	fat globule miRNome	0.010641	1520
bta.miR.1296	whole milk miRNome	-0.01064	1521
bta.chr11_4782_mt	whole milk miRNome	0.0106344	1522
bta.chr12_6810_mt	fat globule miRNome	0.0106329	1523
hsa.miR.20a.3p	fat globule miRNome	-0.0106186	1524
mdo.miR.32.3p	fat globule miRNome	0.0105345	1525
bta.miR.11973	whole milk miRNome	0.0105313	1526
Ras-related protein Rab-8A	skim milk proteome	0.0105296	1527
bta.miR.148d	fat globule miRNome	-0.0105042	1528
mmu.miR.29b.2.5p	whole milk miRNome	0.0105041	1529
mml.miR.452.3p	fat globule miRNome	0.0104771	1530
bta.chr5_36171_mt	fat globule miRNome	-0.0104741	1531
bta.miR.2285ab	fat globule miRNome	0.0104404	1532
bta.chr3_31138_mt	fat globule miRNome	0.0104395	1533
bta.chr7_39493_mt	fat globule miRNome	-0.010416	1534
bta.miR.191b	fat globule miRNome	-0.0104126	1535
bta.chr22_23140_mt	fat globule miRNome	0.0104114	1536
ocu.miR.191.3p	whole milk miRNome	0.0104047	1537
bta.chr22_22768_mt	whole milk miRNome	0.0103984	1538
bta.miR.2285cr	whole milk miRNome	0.0103863	1539
bta.chr4_34135_mt	whole milk miRNome	-0.0103785	1540
bta.chr13_7069_mt	fat globule miRNome	-0.0103773	1541
bta.chr8_42337_st	fat globule miRNome	0.0103772	1542
creatinine	other	-0.0103747	1543
bta.chr11_5887_mt	fat globule miRNome	-0.0103496	1544
bta.miR.2284n	whole milk miRNome	0.0103478	1545
bta.miR.181a	fat globule miRNome	-0.0103475	1546
efu.miR.500	fat globule miRNome	-0.0103426	1547
mmu.miR.182.3p	fat globule miRNome	0.0103264	1548
bta.chr6_38168_mt	whole milk miRNome	-0.0103083	1549
Ribonuclease A family member 4	skim milk proteome	-0.0103032	1550
bta.miR.345.3p	whole milk miRNome	-0.0102951	1551
bta.miR.30f	whole milk miRNome	-0.0102881	1552
bta.chr3_33407_mt	whole milk miRNome	0.0102789	1553
bta.miR.98	whole milk miRNome	0.0102663	1554
bta.chr1_1342_mt	whole milk miRNome	0.0102615	1555
bta.miR.2285ay	fat globule miRNome	-0.0102568	1556
bta.miR.331.3p	whole milk miRNome	-0.0102558	1557
bta.chr5_36523_mt	whole milk miRNome	-0.0102437	1558
bta.miR.1839	whole milk miRNome	0.0102362	1559
bta.miR.1388.3p	fat globule miRNome	0.0102256	1560
bta.miR.2285bn	fat globule miRNome	0.0102117	1561
bta.chr19_17086_mt	fat globule miRNome	-0.0101806	1562
bta.miR.2284h.5p	fat globule miRNome	0.0101479	1563
Keratin, type II cytoskeletal 5	skim milk proteome	0.0101478	1564
bta.miR.32	fat globule miRNome	-0.0101265	1565
bta.chr9_43454_mt	whole milk miRNome	0.0101242	1566
bta.chr29_30995_mt	whole milk miRNome	0.0101025	1567
bta.miR.145	whole milk miRNome	-0.0100788	1568
bta.chr21_21624_mt	whole milk miRNome	-0.010053	1569
bta.chr26_27916_mt	fat globule miRNome	-0.0100408	1570
bta.miR.22.3p	fat globule miRNome	0.0100302	1571
bta.chr14_8669_mt	fat globule miRNome	-0.0100034	1572
bta.chr14_8955_mt	fat globule miRNome	0.00999913	1573
bta.chr13_7371_mt	whole milk miRNome	-0.00997482	1574
bta.chr19_18006_mt	whole milk miRNome	-0.00997234	1575
bta.chr19_17103_mt	fat globule miRNome	-0.0099695	1576
bta.chr14_8681_mt	whole milk miRNome	0.00996621	1577
bta.miR.7858	fat globule miRNome	-0.00993531	1578
bta.chr28_29547_mt	whole milk miRNome	-0.00991089	1579
bta.miR.199c	fat globule miRNome	0.00988304	1580
bta.miR.12044	whole milk miRNome	0.00986337	1581
hsa.miR.152.5p	fat globule miRNome	-0.00981704	1582
bta.chr3_33433_mt	whole milk miRNome	0.00980563	1583
bta.chr21_22093_mt	fat globule miRNome	-0.00978445	1584
bta.miR.502b	fat globule miRNome	-0.00978044	1585
bta.miR.342	whole milk miRNome	0.00977094	1586
bta.chr22_22618_st	fat globule miRNome	-0.00976924	1587
bta.miR.2285s	fat globule miRNome	0.00976279	1588
pal.miR.18a.3p	whole milk miRNome	-0.00972519	1589
bta.chr18_14960_mt	whole milk miRNome	0.00968834	1590
hsa.let.7e.3p	fat globule miRNome	0.00967578	1591
bta.chr25_26957_mt	whole milk miRNome	0.00967436	1592
bta.chrX_44784_mt	fat globule miRNome	0.00967404	1593
pal.miR.874.5p	fat globule miRNome	0.00966378	1594
bta.chr19_18206_mt	fat globule miRNome	0.00963627	1595
bta.chr21_21590_st	whole milk miRNome	0.00961317	1596
bta.chr11_3788_mt	fat globule miRNome	0.00957511	1597
bta.miR.2403	whole milk miRNome	0.00957247	1598
bta.miR.362.3p	fat globule miRNome	0.00957223	1599
bta.chr22_23325_mt	fat globule miRNome	-0.00956304	1600
bta.chr3_32429_mt	fat globule miRNome	-0.0095399	1601
bta.miR.2285bm	whole milk miRNome	0.00953259	1602
bta.miR.10162.5p	fat globule miRNome	0.00951936	1603
bta.chrX_44544_mt	whole milk miRNome	-0.00951801	1604
bta.miR.2285aw	fat globule miRNome	0.0095157	1605
Secretoglobin family 1D member	skim milk proteome	0.0095056	1606
bta.chr11_4184_mt	whole milk miRNome	-0.00948129	1607
Keratin 1	skim milk proteome	-0.00946272	1608
bta.chr4_34583_mt	fat globule miRNome	-0.00945609	1609
hsa.miR.532.3p	whole milk miRNome	-0.00942313	1610
bta.miR.26a	fat globule miRNome	-0.0094125	1611
bta.miR.182	whole milk miRNome	-0.00941085	1612
bta.chr9_43050_st	fat globule miRNome	0.00938632	1613
bta.chr13_8269_mt	whole milk miRNome	-0.00936722	1614
bta.chr25_25852_mt	fat globule miRNome	-0.00934983	1615
mmu.miR.15b.3p	fat globule miRNome	0.00934861	1616
bta.miR.33a	fat globule miRNome	0.00931846	1617
bta.miR.660	fat globule miRNome	-0.00931493	1618
bta.chr10_3038_mt	fat globule miRNome	-0.00929524	1619
bta.miR.197	fat globule miRNome	0.00927889	1620
mmu.miR.16.2.3p	whole milk miRNome	0.0092699	1621
bta.chr7_39829_mt	fat globule miRNome	-0.00925709	1622
Platelet glycoprotein 4	skim milk proteome	0.00922982	1623
bta.chr8_42738_mt	fat globule miRNome	0.0092069	1624
bta.chr4_33646_mt	fat globule miRNome	0.00920268	1625
bta.chr1_597_mt	whole milk miRNome	-0.00920163	1626
bta.chr15_11007_st	whole milk miRNome	0.00917434	1627
bta.chr9_44126_mt	whole milk miRNome	0.00917134	1628
hsa.miR.19b.1.5p	fat globule miRNome	0.00914008	1629
bta.miR.196a	fat globule miRNome	-0.00909135	1630
bta.chr6_38205_mt	whole milk miRNome	-0.00908768	1631
bta.chr21_21423_st	whole milk miRNome	-0.00908522	1632
bta.chr9_43668_st	whole milk miRNome	-0.00907284	1633
bta.miR.2285bp	fat globule miRNome	0.00904493	1634
bta.chr21_22348_mt	fat globule miRNome	-0.0090259	1635
bta.miR.10182.3p	fat globule miRNome	0.00898103	1636
bta.chr15_9739_mt	whole milk miRNome	-0.00895738	1637
bta.chr27_28475_st	whole milk miRNome	0.00894715	1638
chi.miR.3432.3p	whole milk miRNome	0.00893387	1639
bta.miR.2285az	fat globule miRNome	0.00892985	1640
bta.chr19_16517_mt	fat globule miRNome	0.00892724	1641
bta.miR.30c	whole milk miRNome	-0.00892268	1642
bta.miR.2285ax	fat globule miRNome	0.00891615	1643
bta.chr5_37258_mt	whole milk miRNome	-0.00891591	1644
bta.miR.7863	fat globule miRNome	-0.0089155	1645
bta.chr18_14524_mt	fat globule miRNome	0.00890677	1646
bta.chr20_20607_mt	whole milk miRNome	-0.00890516	1647
bta.chr19_17157_mt	fat globule miRNome	-0.0088845	1648
bta.chr3_31229_mt	fat globule miRNome	0.00886971	1649
bta.chr8_42367_mt	whole milk miRNome	0.00884462	1650
bta.chr5_37156_mt	fat globule miRNome	-0.00884284	1651
bta.chr10_2852_mt	whole milk miRNome	0.00880417	1652
bta.chr5_37156_mt	whole milk miRNome	0.00879062	1653
bta.miR.135a	whole milk miRNome	0.00878307	1654
bta.miR.494	whole milk miRNome	0.00878231	1655
bta.miR.11995	fat globule miRNome	-0.00877069	1656
bta.miR.12010	fat globule miRNome	-0.00876574	1657
bta.chr17_13569_mt	whole milk miRNome	0.00876075	1658
bta.chr12_6533_mt	fat globule miRNome	-0.00872235	1659
bta.chr18_15653_st	fat globule miRNome	0.00871259	1660
bta.miR.2284j	fat globule miRNome	0.00870524	1661
bta.miR.133a	fat globule miRNome	0.00869451	1662
bta.chr8_41698_mt	fat globule miRNome	-0.00868014	1663
mmu.miR.30c.1.3p	whole milk miRNome	0.00867137	1664
bta.miR.126.5p	whole milk miRNome	0.00864427	1665
dno.miR.29c.5p	whole milk miRNome	0.00864292	1666
bta.miR.200a	whole milk miRNome	-0.00863739	1667
bta.miR.363	fat globule miRNome	0.00863172	1668
rno.miR.324.3p	fat globule miRNome	0.00862379	1669
bta.miR.6523a	fat globule miRNome	0.00861417	1670
bta.miR.301b	fat globule miRNome	0.00860379	1671
bta.chr15_10278_mt	fat globule miRNome	-0.00860239	1672
bta.miR.379	fat globule miRNome	0.00860127	1673
mmu.miR.30e.3p	whole milk miRNome	0.00859955	1674
bta.chrX_44662_mt	whole milk miRNome	0.00859237	1675
mmu.miR.210.5p	whole milk miRNome	-0.0085907	1676
bta.chr24_25188_mt	whole milk miRNome	-0.0085757	1677
bta.chr4_34757_mt	whole milk miRNome	-0.00856678	1678
bta.chr10_2962_mt	fat globule miRNome	-0.0085362	1679
mmu.miR.130b.5p	whole milk miRNome	0.00852853	1680
bta.chr14_9311_mt	whole milk miRNome	0.00851777	1681
Cysteine-rich secretory protein LCCL domain-containing 2	skim milk proteome	0.0085143	1682
mmu.miR.125a.3p	whole milk miRNome	0.00848992	1683
bta.miR.664b	whole milk miRNome	-0.00848113	1684
bta.miR.2285l	whole milk miRNome	-0.00845645	1685
bta.miR.2285m	fat globule miRNome	0.00843934	1686
bta.miR.410	whole milk miRNome	0.00842645	1687
bta.chr15_10516_mt	whole milk miRNome	0.00842415	1688
bta.chr11_4452_mt	fat globule miRNome	-0.00841349	1689
bta.chr20_20849_mt	fat globule miRNome	0.00839445	1690
bta.miR.11986b	whole milk miRNome	-0.00837109	1691
bta.miR.29d.5p	whole milk miRNome	0.00836126	1692
RAB2B, member RAS oncogene family	skim milk proteome	-0.00834443	1693
RAB10 protein	skim milk proteome	0.00834443	1694
bta.miR.2285bd	whole milk miRNome	-0.00833613	1695
bta.chr5_37163_mt	whole milk miRNome	0.00830097	1696
mmu.miR.183.3p	fat globule miRNome	-0.00830007	1697
bta.miR.126.5p	fat globule miRNome	0.00828801	1698
bta.miR.142.3p	fat globule miRNome	0.00828417	1699
bta.chr29_30418_mt	fat globule miRNome	-0.00825333	1700
bta.chr13_8383_mt	whole milk miRNome	-0.00824571	1701
bta.miR.15b	fat globule miRNome	0.00822138	1702
bta.chr19_17183_mt	fat globule miRNome	0.0082167	1703
bta.miR.2431.3p	whole milk miRNome	0.00821015	1704
bta.chr18_14485_mt	fat globule miRNome	0.0081761	1705
bta.let.7d	fat globule miRNome	-0.00816644	1706
ssc.miR.374a.3p	whole milk miRNome	0.00815664	1707
bta.chr20_20411_mt	fat globule miRNome	-0.00814848	1708
bta.miR.11981	fat globule miRNome	-0.00811874	1709
bta.miR.29e	fat globule miRNome	0.00811644	1710
Synaptobrevin homolog YKT6	skim milk proteome	0.00810811	1711
bta.miR.2478	fat globule miRNome	-0.00810051	1712
bta.miR.11984	fat globule miRNome	-0.00809802	1713
mml.miR.106b.3p	fat globule miRNome	0.00808551	1714
bta.chr6_38985_mt	fat globule miRNome	0.00807681	1715
bta.chr13_8096_mt	fat globule miRNome	0.0080718	1716
bta.miR.2285bk	whole milk miRNome	0.00806483	1717
bta.chr7_39132_mt	whole milk miRNome	-0.00804278	1718
bta.chr12_6014_mt	fat globule miRNome	0.00802317	1719
bta.chr22_23140_mt	whole milk miRNome	-0.0080214	1720
bta.chr17_13781_mt	whole milk miRNome	0.00801843	1721
bta.chr7_39949_mt	whole milk miRNome	0.00801549	1722
RAB1A, member RAS oncogene family	skim milk proteome	-0.00799725	1723
hsa.miR.376c.3p	fat globule miRNome	-0.00798712	1724
bta.miR.12001	whole milk miRNome	-0.00797614	1725
bta.chr11_4310_mt	fat globule miRNome	-0.00797074	1726
bta.miR.6529a	whole milk miRNome	-0.00794852	1727
bta.chr17_13673_mt	fat globule miRNome	0.00794805	1728
bta.chr5_36791_mt	fat globule miRNome	-0.00794276	1729
bta.chr4_34221_mt	whole milk miRNome	-0.00794232	1730
bta.miR.2285bq	fat globule miRNome	0.00791552	1731
hsa.let.7c.3p	whole milk miRNome	-0.00788602	1732
bta.chr18_14520_mt	fat globule miRNome	0.00788494	1733
bta.chr13_8185_mt	whole milk miRNome	0.00788016	1734
bta.miR.11983	fat globule miRNome	0.00787927	1735
mmu.miR.409.3p	fat globule miRNome	0.00787545	1736
bta.miR.2285o	fat globule miRNome	-0.00786441	1737
mml.miR.106b.3p	whole milk miRNome	0.00785253	1738
bta.miR.95	whole milk miRNome	-0.00784969	1739
bta.chr2_20275_mt	whole milk miRNome	0.00783973	1740
bta.chr4_33644_mt	whole milk miRNome	0.00783667	1741
bta.chr13_8151_st	fat globule miRNome	-0.00783596	1742
bta.miR.22.5p	whole milk miRNome	0.0078272	1743
bta.chr6_38678_mt	whole milk miRNome	-0.00781651	1744
bta.chr15_11270_mt	fat globule miRNome	0.00779213	1745
bta.chr4_34814_mt	whole milk miRNome	-0.00778628	1746
bta.chr7_40725_mt	whole milk miRNome	-0.00775297	1747
CIDEA protein	skim milk proteome	-0.0077433	1748
Sodium/nucleoside cotransporter	skim milk proteome	0.0077433	1749
ADP-ribosylation factor 1	skim milk proteome	0.00772871	1750
mmu.miR.200a.5p	fat globule miRNome	-0.00772216	1751
bta.chr21_21906_mt	whole milk miRNome	-0.00771813	1752
bta.miR.2336	fat globule miRNome	0.00770166	1753
bta.chr29_30622_mt	whole milk miRNome	0.00767091	1754
bta.miR.2285ad	whole milk miRNome	0.00762566	1755
bta.miR.149.5p	whole milk miRNome	0.00759544	1756
bta.chr13_7375_mt	whole milk miRNome	-0.00758602	1757
bta.chr13_8003_mt	whole milk miRNome	0.00756519	1758
bta.chr8_42071_mt	whole milk miRNome	0.00756031	1759
Beta lactoglobulin D (Fragment)	skim milk proteome	-0.00754086	1760
bta.chr27_28658_mt	whole milk miRNome	-0.00753939	1761
bta.chr25_25832_mt	whole milk miRNome	0.00753927	1762
bta.chr11_4415_mt	fat globule miRNome	-0.00753323	1763
bta.chr22_23531_mt	whole milk miRNome	-0.00751287	1764
bta.chr14_9248_mt	whole milk miRNome	-0.00750685	1765
bta.miR.2285ay	whole milk miRNome	-0.00749239	1766
bta.miR.2468	fat globule miRNome	0.00748458	1767
bta.miR.2285bw	fat globule miRNome	0.00747444	1768
bta.chr25_26867_mt	whole milk miRNome	-0.00746868	1769
C11H2ORF7 protein	skim milk proteome	0.00743953	1770
bta.chr21_21787_mt	whole milk miRNome	0.00743436	1771
bta.chr22_22541_mt	fat globule miRNome	-0.00743337	1772
bta.miR.3064	whole milk miRNome	-0.00743066	1773
bta.miR.2346	fat globule miRNome	0.00742909	1774
bta.chr5_36097_mt	fat globule miRNome	0.00741924	1775
bta.miR.32	whole milk miRNome	-0.0074056	1776
hsa.miR.885.3p	whole milk miRNome	-0.00739993	1777
bta.miR.424.3p	fat globule miRNome	0.00737365	1778
efu.miR.30a	whole milk miRNome	0.007373	1779
bta.chr29_30941_mt	whole milk miRNome	0.00736991	1780
bta.chr8_41325_mt	fat globule miRNome	-0.00735994	1781
bta.chr11_5260_mt	whole milk miRNome	0.00728212	1782
chi.miR.28.3p	fat globule miRNome	0.0072646	1783
oha.miR.98.3p	fat globule miRNome	0.00724289	1784
bta.chr14_8902_mt	whole milk miRNome	0.00723505	1785
bta.chr29_30368_mt	whole milk miRNome	-0.00722503	1786
bta.chrX_45642_mt	whole milk miRNome	0.00722495	1787
bta.miR.11985	whole milk miRNome	-0.00721814	1788
bta.chr3_32371_mt	whole milk miRNome	0.00718524	1789
bta.chr19_16180_mt	whole milk miRNome	-0.00718064	1790
hsa.miR.320a.5p	whole milk miRNome	-0.00717969	1791
bta.miR.423.3p	whole milk miRNome	-0.0071593	1792
bta.chr19_17157_mt	whole milk miRNome	-0.00714938	1793
bta.miR.12034	whole milk miRNome	-0.00714386	1794
bta.chr19_17157_st	whole milk miRNome	0.00713581	1795
bta.chr11_4332_mt	fat globule miRNome	0.00711297	1796
bta.chr8_42857_mt	fat globule miRNome	-0.00711089	1797
bta.chr22_22768_st	fat globule miRNome	0.00710826	1798
CD81 antigen	skim milk proteome	-0.00710761	1799
bta.chr13_7375_mt	fat globule miRNome	0.00710227	1800
bta.chr3_33181_mt	fat globule miRNome	0.00709584	1801
bta.chr21_21590_mt	whole milk miRNome	0.00709134	1802
bta.miR.12035	whole milk miRNome	0.00708942	1803
bta.miR.2285j	whole milk miRNome	0.00708133	1804
bta.miR.495	fat globule miRNome	0.00707805	1805
bta.chr9_44129_mt	whole milk miRNome	0.00706773	1806
bta.miR.127	fat globule miRNome	0.00706262	1807
bta.chrX_44647_mt	fat globule miRNome	0.0070554	1808
bta.chr13_7146_mt	whole milk miRNome	0.00704235	1809
bta.chr21_22320_mt	whole milk miRNome	0.00704021	1810
bta.miR.6516	fat globule miRNome	-0.00703717	1811
pal.miR.874.5p	whole milk miRNome	0.00700975	1812
bta.chr3_31152_mt	fat globule miRNome	0.00700117	1813
bta.miR.224	fat globule miRNome	-0.00700099	1814
bta.chr2_19523_mt	whole milk miRNome	0.00700019	1815
bta.chr24_25376_mt	whole milk miRNome	0.00699047	1816
bta.chr15_9826_mt	whole milk miRNome	0.00698298	1817
NADH-cytochrome b5 reductase 3	skim milk proteome	-0.00697127	1818
bta.miR.129.3p	fat globule miRNome	0.00696265	1819
bta.miR.1949	whole milk miRNome	0.00695227	1820
bta.chr18_15203_mt	whole milk miRNome	0.00695102	1821
bta.miR.29b	whole milk miRNome	-0.00694251	1822
bta.miR.11976	whole milk miRNome	-0.00693895	1823
bta.chr7_39213_mt	whole milk miRNome	0.00692676	1824
bta.miR.532	whole milk miRNome	0.00691104	1825
hsa.miR.365b.5p	whole milk miRNome	0.00689571	1826
bta.chr17_13185_mt	fat globule miRNome	0.00686199	1827
bta.miR.2285ai.5p	fat globule miRNome	-0.00680754	1828
bta.chr16_12006_mt	fat globule miRNome	0.00678455	1829
bta.miR.2285db	fat globule miRNome	-0.00676156	1830
bta.chr11_4727_mt	fat globule miRNome	0.00673616	1831
bta.miR.382	fat globule miRNome	-0.00673616	1832
bta.miR.2285cw	fat globule miRNome	-0.00673025	1833
bta.chr3_33159_mt	fat globule miRNome	-0.00672895	1834
hsa.miR.190a.3p	fat globule miRNome	-0.00672842	1835
bta.chr13_7892_mt	fat globule miRNome	-0.00672746	1836
bta.chr19_16184_mt	whole milk miRNome	-0.00672704	1837
bta.chr8_42619_mt	fat globule miRNome	-0.00671822	1838
1-acyl-sn-glycerol-3-phosphate acyltransferase alpha	skim milk proteome	-0.0067059	1839
bta.chr5_35699_mt	fat globule miRNome	-0.00669471	1840
bta.miR.497	fat globule miRNome	0.00669276	1841
bta.miR.93	fat globule miRNome	0.00669175	1842
dno.miR.326.5p	whole milk miRNome	-0.00668231	1843
bta.miR.2285cp	fat globule miRNome	-0.00668018	1844
bta.chrX_44532_mt	whole milk miRNome	-0.00667103	1845
bta.chr24_25541_mt	fat globule miRNome	-0.00665595	1846
bta.miR.2285cx	fat globule miRNome	0.00665363	1847
bta.chr5_35121_mt	whole milk miRNome	-0.00665206	1848
bta.chr5_37343_mt	fat globule miRNome	-0.0066484	1849
Complement component C7	skim milk proteome	0.00664224	1850
hsa.miR.15a.3p	fat globule miRNome	0.00664179	1851
bta.miR.219b.3p	fat globule miRNome	0.00663573	1852
bta.chrUn_GJ059766v1_44440_mt	fat globule miRNome	-0.00663211	1853
bta.chr3_32572_mt	whole milk miRNome	0.00659053	1854
bta.chr9_43684_mt	whole milk miRNome	-0.00658832	1855
bta.miR.378d	whole milk miRNome	0.00656619	1856
bta.chr9_43668_mt	whole milk miRNome	0.00654364	1857
bta.miR.7180	fat globule miRNome	-0.00654149	1858
bta.chr29_30983_mt	whole milk miRNome	-0.00653535	1859
bta.chr6_39010_mt	whole milk miRNome	-0.00653335	1860
bta.chr11_5059_mt	whole milk miRNome	-0.00652252	1861
bta.miR.12004	fat globule miRNome	0.00652178	1862
bta.miR.11981	whole milk miRNome	-0.00651968	1863
bta.miR.2285bb	fat globule miRNome	0.00651357	1864
bta.chrX_44784_mt	whole milk miRNome	0.00651129	1865
bta.chr13_8332_mt	whole milk miRNome	0.00650356	1866
bta.miR.2339	fat globule miRNome	-0.0064967	1867
bta.miR.155	fat globule miRNome	0.00648409	1868
bta.miR.3431	whole milk miRNome	0.00647661	1869
hsa.miR.128.1.5p	fat globule miRNome	-0.00646925	1870
bta.miR.2285t	fat globule miRNome	0.00644632	1871
bta.chr17_13733_mt	fat globule miRNome	0.00643442	1872
bta.chr2_18354_mt	whole milk miRNome	-0.00643256	1873
bta.chr13_7543_mt	fat globule miRNome	0.00639413	1874
bta.chr3_31978_mt	whole milk miRNome	-0.00639131	1875
bta.chr7_40856_mt	whole milk miRNome	-0.00636718	1876
bta.miR.452	fat globule miRNome	0.00636399	1877
bta.chr5_36355_st	fat globule miRNome	-0.00635429	1878
bta.miR.33b	whole milk miRNome	0.00634025	1879
bta.miR.12030	whole milk miRNome	0.00633167	1880
bta.miR.628	fat globule miRNome	0.00632372	1881
bta.miR.205	fat globule miRNome	0.00632199	1882
bta.chr25_26350_mt	whole milk miRNome	0.00631997	1883
tgu.let.7b.3p	whole milk miRNome	0.00631807	1884
bta.chr15_10874_mt	whole milk miRNome	0.00631733	1885
bta.chr24_25739_mt	whole milk miRNome	-0.00631585	1886
ocu.miR.9851.5p	whole milk miRNome	-0.00631367	1887
bta.chr12_6917_mt	whole milk miRNome	-0.00630497	1888
bta.miR.28	fat globule miRNome	-0.00629453	1889
hsa.miR.1307.5p	whole milk miRNome	0.00627388	1890
Ras-related protein Rab-6B	skim milk proteome	-0.00626464	1891
bta.miR.2285bg	fat globule miRNome	-0.00624336	1892
bta.chr2_19403_mt	whole milk miRNome	-0.00624114	1893
bta.chr6_38867_st	fat globule miRNome	-0.00623264	1894
bta.chr17_13423_mt	whole milk miRNome	-0.00622769	1895
bta.chr8_42367_mt	fat globule miRNome	0.00622073	1896
bta.miR.12034	fat globule miRNome	-0.00621589	1897
bta.chr22_23087_mt	whole milk miRNome	-0.00621397	1898
bta.miR.2285ak.5p	fat globule miRNome	0.00620775	1899
bta.chr29_29761_mt	fat globule miRNome	0.00617577	1900
bta.chr29_29795_mt	fat globule miRNome	0.00616151	1901
bta.chr19_17411_mt	whole milk miRNome	0.00615064	1902
bta.chr5_36184_mt	fat globule miRNome	-0.00614594	1903
ami.miR.215.3p	fat globule miRNome	-0.00614583	1904
bta.chr12_6798_mt	fat globule miRNome	-0.00614078	1905
bta.miR.374b	fat globule miRNome	-0.00611411	1906
bta.chr4_34117_st	whole milk miRNome	-0.00611061	1907
hsa.miR.885.3p	fat globule miRNome	0.00607541	1908
bta.miR.135b	whole milk miRNome	0.00606724	1909
bta.miR.11995	whole milk miRNome	0.00604409	1910
bta.miR.331.5p	fat globule miRNome	0.00603362	1911
bta.miR.11986	whole milk miRNome	0.006028	1912
bta.chr6_37699_mt	whole milk miRNome	0.00597955	1913
bta.chr21_21521_mt	fat globule miRNome	-0.00596592	1914
bta.miR.23a	fat globule miRNome	0.00595105	1915
hsa.miR.103a.2.5p	whole milk miRNome	0.00593198	1916
bta.chr27_28749_mt	fat globule miRNome	-0.00592337	1917
bta.chr8_42495_mt	fat globule miRNome	-0.00590632	1918
bta.miR.2285cs	fat globule miRNome	-0.00587313	1919
bta.miR.9.5p	fat globule miRNome	-0.00586669	1920
bta.chr22_23020_mt	whole milk miRNome	-0.00584657	1921
bta.chr11_3788_mt	whole milk miRNome	-0.00584574	1922
bta.chr25_26527_mt	fat globule miRNome	-0.00584509	1923
bta.chr5_36259_mt	fat globule miRNome	-0.00584031	1924
bta.chr9_43050_mt	fat globule miRNome	-0.00583343	1925
bta.chr19_17547_mt	fat globule miRNome	0.00582875	1926
bta.chr6_37774_mt	fat globule miRNome	-0.00582847	1927
bta.miR.2285de	fat globule miRNome	-0.00582165	1928
bta.chr3_32023_mt	whole milk miRNome	-0.00582011	1929
bta.chr19_17201_mt	whole milk miRNome	-0.00578817	1930
bta.miR.760.3p	whole milk miRNome	0.00576791	1931
bta.miR.145	fat globule miRNome	0.0057613	1932
bta.chr12_6478_mt	fat globule miRNome	0.00575366	1933
bta.chr1_1683_mt	whole milk miRNome	-0.00575134	1934
bta.miR.491	whole milk miRNome	0.00574565	1935
bta.miR.1271	fat globule miRNome	0.00573274	1936
bta.chr2_19383_mt	whole milk miRNome	-0.0057191	1937
bta.miR.1260b	whole milk miRNome	0.00568895	1938
bta.chr20_20426_mt	whole milk miRNome	0.0056808	1939
bta.miR.191b	whole milk miRNome	-0.00567606	1940
bta.miR.2320.5p	whole milk miRNome	0.00567536	1941
bta.chr15_11007_mt	whole milk miRNome	0.00565851	1942
bta.chr14_9459_mt	whole milk miRNome	-0.00565188	1943
bta.chr23_23773_mt	fat globule miRNome	-0.00564015	1944
bta.chr15_10558_mt	fat globule miRNome	-0.00563509	1945
bta.chr18_15852_mt	whole milk miRNome	0.0056218	1946
bta.miR.92a	fat globule miRNome	-0.00561631	1947
bta.chr7_40750_mt	whole milk miRNome	-0.00556632	1948
bta.chr16_12761_mt	whole milk miRNome	0.00555799	1949
bta.miR.141	whole milk miRNome	-0.00555489	1950
bta.chr6_37774_mt	whole milk miRNome	0.00554156	1951
bta.chr18_14730_mt	fat globule miRNome	0.00552983	1952
bta.chr10_2746_mt	fat globule miRNome	-0.00552854	1953
bta.chr13_7479_mt	whole milk miRNome	0.00552578	1954
Uncharacterized protein	skim milk proteome	0.00551377	1955
chi.miR.28.3p	whole milk miRNome	-0.00551287	1956
bta.miR.2285cl	fat globule miRNome	0.00550494	1957
rno.miR.27b.5p	fat globule miRNome	-0.00550049	1958
bta.miR.12036	whole milk miRNome	-0.00547955	1959
bta.miR.11972	whole milk miRNome	-0.00546962	1960
Glycosylation-dependent cell adhesion molecule 1	skim milk proteome	0.00545961	1961
bta.chr6_38168_mt	fat globule miRNome	0.00544899	1962
bta.chr24_25220_mt	whole milk miRNome	0.00543403	1963
bta.chr21_22023_mt	whole milk miRNome	-0.0054246	1964
bta.miR.92a	whole milk miRNome	-0.00541958	1965
bta.chr3_32081_mt	whole milk miRNome	0.00541841	1966
bta.miR.2284u	fat globule miRNome	0.00541595	1967
bta.miR.2284ab	fat globule miRNome	-0.00540277	1968
bta.chr13_8003_mt	fat globule miRNome	-0.00539672	1969
bta.chr22_23325_mt	whole milk miRNome	0.00539526	1970
bta.chr19_17406_mt	whole milk miRNome	-0.00539471	1971
bta.chr29_30458_mt	fat globule miRNome	-0.00538917	1972
bta.chr19_17195_mt	fat globule miRNome	0.0053864	1973
hsa.let.7d.3p	fat globule miRNome	-0.00538041	1974
bta.chr19_17746_mt	whole milk miRNome	0.0053661	1975
bta.miR.2285dk	whole milk miRNome	0.00535188	1976
bta.chr15_10050_mt	fat globule miRNome	-0.00533946	1977
bta.chr14_9202_mt	fat globule miRNome	0.00533591	1978
bta.miR.126.3p	fat globule miRNome	-0.00533529	1979
bta.chr3_31445_mt	whole milk miRNome	0.00533111	1980
bta.chr18_14524_st	fat globule miRNome	-0.00532263	1981
bta.miR.7857.5p	fat globule miRNome	0.00530057	1982
bta.chr19_17323_mt	whole milk miRNome	-0.00525315	1983
bta.miR.181a	whole milk miRNome	0.00523912	1984
bta.chr19_16706_mt	fat globule miRNome	-0.00523681	1985
hsa.miR.541.5p	whole milk miRNome	-0.00523438	1986
bta.miR.12012	whole milk miRNome	0.00523318	1987
bta.chr18_14505_mt	fat globule miRNome	0.00518991	1988
bta.chr8_41647_mt	fat globule miRNome	-0.00517379	1989
bta.let.7b	whole milk miRNome	0.00517295	1990
bta.chr25_25879_mt	whole milk miRNome	0.00515482	1991
bta.chr3_32263_mt	whole milk miRNome	0.00514305	1992
bta.miR.2447	fat globule miRNome	0.00513264	1993
bta.miR.194	fat globule miRNome	-0.00512515	1994
bta.chr10_3455_mt	whole milk miRNome	0.0051207	1995
bta.miR.504	whole milk miRNome	0.00511164	1996
mmu.miR.200a.5p	whole milk miRNome	-0.00511019	1997
bta.miR.6119.3p	whole milk miRNome	0.00509849	1998
hsa.miR.30d.3p	fat globule miRNome	0.00507526	1999
[truncated: 488 more rows]
